## 1 PPTC7 limits mitophagy through proximal and dynamic interactions with BNIP3 and NIX

2  
3 Lianjie Wei<sup>1</sup>, Mehmet Oguz Gok<sup>2</sup>, Jordyn D. Svoboda<sup>1</sup>, Merima Forny<sup>1</sup>, Jonathan R. Friedman<sup>2</sup>,  
4 & Natalie M. Niemi<sup>1\*</sup>

5  
6 <sup>1</sup>Department of Biochemistry & Molecular Biophysics, Washington University School of Medicine  
7 in St. Louis, St. Louis, MO, 63110, USA

8 <sup>2</sup>Department of Cell Biology, University of Texas Southwestern Medical Center, Dallas, TX 75390,  
9 USA

10  
11 \*Correspondence: [niemi@wustl.edu](mailto:niemi@wustl.edu)

### 12 13 Abstract

14  
15 PPTC7 is a mitochondrial-localized PP2C phosphatase that maintains mitochondrial protein  
16 content and metabolic homeostasis. We previously demonstrated that knockout of *Pptc7* elevates  
17 mitophagy in a BNIP3- and NIX-dependent manner, but the mechanisms by which PPTC7  
18 influences receptor-mediated mitophagy remain ill-defined. Here, we demonstrate that loss of  
19 PPTC7 upregulates BNIP3 and NIX post-transcriptionally and independent of HIF-1 $\alpha$  stabilization.  
20 On a molecular level, loss of *PPTC7* prolongs the half-life of BNIP3 and NIX while blunting their  
21 accumulation in response to proteasomal inhibition, suggesting that PPTC7 promotes the  
22 ubiquitin-mediated turnover of BNIP3 and NIX. Consistently, overexpression of PPTC7 limits the  
23 accumulation of BNIP3 and NIX protein levels in response to pseudohypoxia, a well-known  
24 inducer of mitophagy. This PPTC7-mediated suppression of BNIP3 and NIX protein expression  
25 requires an intact PP2C catalytic motif but is surprisingly independent of its mitochondrial  
26 targeting, indicating that PPTC7 influences mitophagy outside of the mitochondrial matrix. We  
27 find that PPTC7 exists in at least two distinct states in cells: a longer isoform, which likely  
28 represents full length protein, and a shorter isoform, which likely represents an imported, matrix-  
29 localized phosphatase pool. Importantly, anchoring PPTC7 to the outer mitochondrial membrane  
30 is sufficient to blunt BNIP3 and NIX accumulation, and proximity labeling and fluorescence co-  
31 localization experiments suggest that PPTC7 associates with BNIP3 and NIX within the native  
32 cellular environment. Importantly, these associations are enhanced in cellular conditions that  
33 promote BNIP3 and NIX turnover, demonstrating that PPTC7 is dynamically recruited to BNIP3  
34 and NIX to facilitate their degradation. Collectively, these data reveal that a fraction of PPTC7  
35 dynamically localizes to the outer mitochondrial membrane to promote the proteasomal turnover  
36 of BNIP3 and NIX.

### 37 38 39 Introduction

40  
41 Mitophagy, or mitochondrial-specific autophagy, is a conserved organellar quality control  
42 process that promotes the selective turnover of damaged or superfluous mitochondria across  
43 cellular conditions (Pickles *et al*, 2018; Uoselis *et al*, 2023). During mitophagy, mitochondria are  
44 selectively tagged for degradation by the activation of either ubiquitin-associated pathways or  
45 specific mitophagy receptors. Multiple human diseases result from with mutations within  
46 mitophagy-associated genes, such as Parkinson Disease (Valente *et al*, 2004; Kitada *et al*, 1998;  
47 Zimprich *et al*, 2011) and Amyotrophic Lateral Sclerosis (Maruyama *et al*, 2010). Most of these  
48 disease-associated mutations lessen the activation or efficiency of mitophagy, suggesting that  
49 enhancing mitophagy may promote mitochondrial function and alleviate various human  
50 pathologies (Mishra & Thakur, 2023; Lee & Kim, 2014; Wang *et al*, 2023). Interestingly, however,  
51 recent studies show that unrestrained mitophagy may also trigger pathophysiology, particularly

52 through disrupting the regulation of the mitophagy receptors BNIP3 and NIX (Bonnen *et al*, 2013;  
53 Gai *et al*, 2013; Cao *et al*, 2023; Elcocks *et al*, 2023; Nguyen-Dien *et al*, 2023).

54 BNIP3 and NIX have long been associated with mitochondrial turnover. Well-  
55 characterized as transcriptional targets of Hypoxia Inducible Factor 1 $\alpha$  (HIF-1 $\alpha$ ), BNIP3 and NIX  
56 are upregulated during hypoxia to decrease mitochondrial content due to limited oxygen  
57 availability (Ney, 2015). NIX promotes mitochondrial clearance during erythropoiesis to prevent  
58 mature red blood cells from consuming the oxygen they carry before it is delivered to distal tissues  
59 (Schweers *et al*, 2007). Similarly, BNIP3 and NIX induce mitochondrial turnover and subsequent  
60 metabolic reprogramming in various models of cellular differentiation, including neurons  
61 (Ordureau *et al*, 2021), myoblasts (Sin *et al*, 2016), and cardiomyocytes (Esteban-Martinez &  
62 Boya, 2018; Zhao *et al*, 2020). These studies demonstrate that BNIP3 and NIX can potently  
63 decrease mitochondrial content across cell types, indicating the levels of these mitophagy  
64 receptors must be tightly regulated to prevent excessive mitochondrial clearance. Consistently,  
65 recent studies have shown that loss of the mitochondrial E3 ubiquitin ligase FBXL4 unleashes  
66 BNIP3- and NIX-mediated mitophagy, leading to decreased mitochondrial protein levels, mtDNA  
67 depletion, and perinatal lethality in mice (Alsina *et al*, 2020; Cao *et al*, 2023; Elcocks *et al*, 2023;  
68 Nguyen-Dien *et al*, 2023). Mutations in human *FBXL4* cause Mitochondrial DNA Depletion  
69 Syndrome 13 (MTDPS13) a severe pathology characterized by encephalopathy, stunted growth,  
70 and metabolic deficiencies (Bonnen *et al*, 2013; Gai *et al*, 2013; Dai *et al*, 2017; Ballout *et al*,  
71 2019). Importantly, these human mutations disrupt the ability of FBXL4 to promote BNIP3 and  
72 NIX turnover (Cao *et al*, 2023; Elcocks *et al*, 2023; Nguyen-Dien *et al*, 2023), suggesting that  
73 excessive BNIP3 and NIX accumulation constitutes a substantial organismal liability. Despite this,  
74 the mechanisms restraining these mitophagy receptors under basal conditions have not been fully  
75 defined.

76 We previously identified the mitochondrial-resident protein phosphatase PPTC7 as a  
77 regulator of BNIP3- and NIX-mediated mitophagy (Niemi *et al*, 2023). Knockout of *Pptc7* in mice  
78 led to fully penetrant perinatal lethality concomitant to metabolic defects, including hypoketotic  
79 hypoglycemia (Niemi *et al*, 2019). Strikingly, tissues and cells isolated from *Pptc7* knockout  
80 animals showed robustly decreased mitochondrial protein levels as well as consistently elevated  
81 BNIP3 and NIX protein expression (Niemi *et al*, 2019), indicating that unchecked BNIP3 and NIX  
82 expression may drive mitochondrial loss through excessive mitophagy. Indeed, knockout of *Bnip3*  
83 and *Nix* within the *Pptc7* knockout background largely rescues mitochondrial protein levels and  
84 elevated mitophagy (Niemi *et al*, 2023). Additionally, we found that BNIP3 and NIX are  
85 hyperphosphorylated in *Pptc7* knockout systems, and that PPTC7 can directly interact with BNIP3  
86 and NIX to facilitate their dephosphorylation *in vitro* (Niemi *et al*, 2023). These data demonstrate  
87 that PPTC7 acts as a critical negative regulator of BNIP3- and NIX-mediated mitophagy. However,  
88 the precise molecular mechanism(s) by which PPTC7 influences BNIP3 and NIX protein levels  
89 and mitophagic flux remain unclear, particularly given that these proteins reside in separate  
90 mitochondrial compartments (Rhee *et al*, 2013; Hung *et al*, 2017). Here, we use a combination of  
91 biochemical and cellular assays to demonstrate that PPTC7 proximally and dynamically interacts  
92 with BNIP3 and NIX to promote their turnover and limit basal receptor mediated mitophagy.

93

## 94 **Results**

95

### 96 **PPTC7 regulates BNIP3 and NIX post-transcriptionally and independent of HIF-1 $\alpha$**

97

98 We previously reported that BNIP3 and NIX were significantly upregulated in tissues and cells  
99 derived from *Pptc7*<sup>-/-</sup> mice (Niemi *et al*, 2019, 2023). Consistently, *Pptc7* knockout (KO) mouse  
100 embryonic fibroblasts (MEFs, Figure 1A) and *PPTC7* KO 293T cells (Figure 1B) showed elevated  
101 expression of BNIP3 and NIX relative to wild-type cells. To understand the mechanisms  
102 underlying BNIP3 and NIX upregulation upon *PPTC7* loss, we investigated the involvement of

103 Hypoxia Inducible Factor-1 $\alpha$  (HIF-1 $\alpha$ ) in mediating this response. *BNIP3* and *NIX* are well-  
104 established transcriptional targets of HIF-1 $\alpha$  in conditions of hypoxia, as well as pseudohypoxia  
105 through various pharmacological stimuli (e.g., the iron chelators deferoxamine (DFO) and  
106 deferiprone (DFP) as well as cobalt chloride) (Allen *et al*, 2013; Wang & Semenza, 1993a, 1993b).  
107 We thus hypothesized that the increase in BNIP3 and NIX protein levels in *PPTC7* KO cells may  
108 be due to elevated HIF-1 $\alpha$  activity. To test this, we immunoblotted for HIF-1 $\alpha$  expression in wild-  
109 type and *PPTC7* KO cells in both basal conditions as well as in the presence of bafilomycin A1  
110 (Baf-A1), a compound previously shown to stabilize HIF-1 $\alpha$  (Hubbi *et al*, 2013). These  
111 experiments revealed no differences in HIF-1 $\alpha$  protein expression between wild-type and *PPTC7*  
112 KO cells across tested conditions (Figure 1C). Additionally, we found no significant changes in  
113 the abundance of select HIF-regulated proteins relative to other proteins across our previously  
114 collected proteomics datasets in *Pptc7* KO mouse tissues (Niemi *et al*, 2019) (Supplemental  
115 Figure 1A). We next tested whether BNIP3 and NIX were transcriptionally upregulated but found  
116 no significant differences in *BNIP3* or *NIX* mRNA levels between wild-type and *PPTC7* KO 293T  
117 cells (Figure 1D). Consistently, we found that the transient transfection of plasmids encoding myc-  
118 BNIP3 or FLAG-NIX led to increased protein expression in *PPTC7* KO 293T cells relative to wild-  
119 type 293T cells (Supplemental Figures 1B, C). As these plasmids are driven by the same CMV  
120 promoter in both wild-type and *PPTC7* KO cells, the elevated BNIP3 and NIX protein expression  
121 seen in *PPTC7* KO likely occurs independent of transcriptional changes. Together, these data  
122 indicate that *PPTC7* influences BNIP3 and NIX protein expression post-transcriptionally and  
123 independent of HIF-1 $\alpha$ .

124 The HIF-1 $\alpha$ -independent upregulation of BNIP3 and NIX in *PPTC7* KO cells suggests that  
125 HIF-1 $\alpha$  and *PPTC7* regulate BNIP3 and NIX through parallel pathways. If true, we hypothesized  
126 that loss of *PPTC7* would not alter BNIP3 and NIX transcriptional induction upon HIF activation,  
127 but would promote an additive increase in BNIP3 and NIX protein levels. Indeed, treatment of  
128 both wild-type and *PPTC7* KO cells with the iron chelator DFO induced similar fold changes in  
129 *BNIP3* (Figure 1E) and *NIX* (Figure 1G) mRNA transcripts across genotypes. At the protein level,  
130 expression of BNIP3 (Figure 1F) and NIX (Figure 1H) were substantially higher in DFO-treated  
131 *PPTC7* KO cells relative to other tested conditions. Notably, basal protein expression of BNIP3  
132 and NIX in untreated *PPTC7* KO cells exceeded BNIP3 and NIX induction in DFO-treated wild-  
133 type cells (Figures 1F and 1H), indicating the magnitude of BNIP3 and NIX upregulation in the  
134 absence of *PPTC7*. These experiments further indicate that neither BNIP3 nor NIX is maximally  
135 upregulated in *PPTC7* knockout cells in basal conditions.

136 The additive increase in BNIP3 and NIX expression in *PPTC7* KO cells upon DFO  
137 treatment led us to hypothesize that mitophagic flux would be elevated in DFO-treated *PPTC7*  
138 knockout cells relative to either condition independently. To test this, we assayed wild-type and  
139 *Pptc7* KO MEFs expressing mt-Keima, a pH-sensitive fluorescent mitophagy sensor (Sun *et al*,  
140 2017) using flow cytometry. We first exposed wild-type or *Pptc7* KO MEFs to varying  
141 concentrations of DFO and found that only the highest tested dose of DFO, 100  $\mu$ M, induced  
142 mitophagy in wild-type cells (Supplemental Figures 1D-F). Notably, the percentage of cells  
143 undergoing high mitophagic flux in wild-type cells treated with 100  $\mu$ M DFO remained below the  
144 rates of mitophagic induction in untreated *Pptc7* KO cells (Supplemental Figures 1D-F). We  
145 repeated these experiments in wild-type, *Pptc7* KO, and *Pptc7/Bnip3/Nix* triple knockout (TKO)  
146 MEFs and found that 100  $\mu$ M DFO induced an approximate three-fold increase in mitophagic flux  
147 in both wild-type and *Pptc7* KO cells (Figures 1I-K). However, the absolute levels of mitophagy in  
148 DFO-treated *Pptc7* KO cells significantly exceeded those of DFO-treated wild-type cells as well  
149 as untreated *Pptc7* KO cells (Figures 1I-K). Importantly, mt-Keima-positive *Pptc7/Bnip3/Nix* TKO  
150 cells fail to undergo appreciable mitophagy in the presence of 100  $\mu$ M DFO, demonstrating their  
151 necessity in increasing mitophagic flux in *Pptc7* knockout cells (Figures 1I-K). Collectively, these  
152 data demonstrate that BNIP3 and NIX are post-transcriptionally upregulated to induce mitophagy

153 in *PPTC7* KO cells, and that transcriptional activation of HIF-1 $\alpha$  can substantially enhance  
154 BNIP3/NIX protein expression and mitophagy in the absence of *PPTC7*.  
155

### 156 ***PPTC7* enables BNIP3 and NIX turnover through proteasomal degradation**

157

158 The elevated protein expression of BNIP3 and NIX in *PPTC7* knockout cells implies that *PPTC7*  
159 alters the synthesis or turnover rates of these mitophagy receptors. BNIP3 and NIX turnover has  
160 emerged as a critical regulatory step in limiting basal mitophagy, as evidenced by recent studies  
161 on the E3 ubiquitin ligase FBXL4 (Cao *et al*, 2023; Elcocks *et al*, 2023; Nguyen-Dien *et al*, 2023).  
162 Loss of *FBXL4* phenotypically mirrors *PPTC7* KO in mice, and *PPTC7* and *FBXL4* have significant  
163 and positively correlated essentiality profiles across over one-thousand cancer cell lines  
164 (Supplemental Figure 2A, (Dempster *et al*, 2019)). These data suggest that *PPTC7* and *FBXL4*  
165 influence BNIP3 and NIX via similar mechanisms, leading us to hypothesize that BNIP3 and NIX  
166 have decreased turnover rates in *PPTC7* knockout cells relative to wild-type cells.

167 To test this, we first sought to identify an experimental condition in which we could quantify  
168 endogenous BNIP3 and NIX turnover. We noted that DFO-mediated iron chelation was previously  
169 shown to decrease the protein level of select mitochondrial proteins in a manner that was  
170 reversible upon compound washout (Rensvold *et al*, 2013). As BNIP3 and NIX accumulate in  
171 response to DFO (Figure 1), we hypothesized that washout of DFO would induce BNIP3 turnover  
172 due to its short half-life (Schäfer *et al*, 2022) (Figure 2A). Indeed, treatment of wild-type 293T cells  
173 with DFO increased BNIP3 levels in a time-dependent manner, which returned to at or near  
174 baseline (i.e., untreated) levels 24 hours after DFO washout (Figure 2B). Thus, DFO washout  
175 constitutes an experimental system in which we could test the effects of *PPTC7* on the turnover  
176 of endogenous BNIP3. We repeated these experiments in wild-type and *PPTC7* knockout 293T  
177 cells and found that BNIP3 and NIX exhibited blunted turnover in *PPTC7* KO cells (Figures 2C-F,  
178 Supplemental Figure 2B-E). Modeling of BNIP3 and NIX decay rates showed that loss of *PPTC7*  
179 extends the half-life of monomeric and dimeric populations of BNIP3 and NIX (Figures 2C-F).  
180 While the dimer populations of BNIP3 and NIX have at least a doubling of protein half-life in  
181 *PPTC7* KO cells relative to wild-type cells, the half-lives of the monomeric populations of each  
182 mitophagy receptor could not be effectively modeled in *PPTC7* KO cells, consistent with  
183 substantial suppression of the turnover of these species of BNIP3 and NIX in the absence of  
184 *PPTC7* (Figures 2C-F).

185 Given the slowed rates of BNIP3 and NIX turnover in *PPTC7* KO cells, we sought to  
186 understand the pathway(s) contributing to their degradation. The phenotypic similarities between  
187 loss-of-function models of *PPTC7* and *FBXL4*, as described above, suggest that these two  
188 proteins function in a similar pathway. Additionally, previous work has shown that BNIP3  
189 accumulates in response to the proteasomal inhibitor MG-132 (Park *et al*, 2013; Poole *et al*, 2021).  
190 If knockout of *PPTC7* suppresses the proteasomal degradation of BNIP3 and NIX, we  
191 hypothesized that *PPTC7* KO cells would be less responsive to the proteasomal inhibitor MG-132  
192 than matched wild-type cells. We found that BNIP3 and NIX levels increased in wild-type cells  
193 upon MG-132 treatment (Figures 2G, H), but that the level of each receptor was significantly less  
194 responsive to MG-132 in *PPTC7* KO cells (Figures 2G, H). To further test this model, we exploited  
195 the DFO washout assay, predicting that if BNIP3 and NIX were turned over by proteasomal  
196 degradation upon DFO washout, MG-132 treatment would slow their turnover rates in wild-type  
197 cells but have a diminished effect in *PPTC7* KO cells. We found that, upon DFO washout, MG132  
198 treatment causes BNIP3 and NIX accumulation in wild-type cells, while the levels of these proteins  
199 remain largely unchanged in *PPTC7* KO cells under identical conditions (Figure 2I). Overall, these  
200 data demonstrate that *PPTC7* enables the efficient turnover of BNIP3 and NIX in a manner that  
201 largely depends upon proteasomal degradation.  
202

## 203 **PPTC7 requires an intact active site but not a mitochondrial targeting sequence to limit** 204 **BNIP3 and NIX accumulation**

205  
206 As loss of *PPTC7* increases BNIP3 expression, we hypothesized that PPTC7 overexpression  
207 may diminish BNIP3 upregulation induced by pseudohypoxia. To test this, we overexpressed  
208 either cytosolic GFP or PPTC7-GFP in HeLa cells that were treated with the pseudohypoxia  
209 inducer cobalt chloride (CoCl<sub>2</sub>). We fixed and immunolabeled these cells to examine endogenous  
210 BNIP3 levels relative to the general mitochondrial marker TOMM20. CoCl<sub>2</sub> robustly upregulated  
211 BNIP3 protein expression, and mitochondrial BNIP3 staining could be detected in nearly all cells  
212 transfected with cytosolic GFP (Figure 3A). In contrast to cytosolic GFP, PPTC7-GFP co-localized  
213 with the mitochondrial marker TOMM20 as expected (Figure 3A). Notably, mitochondrial BNIP3  
214 signal was rarely detected in the subset of cells expressing PPTC7-GFP (Figures 3A, B). On a  
215 functional level, overexpression of PPTC7 additionally suppressed CoCl<sub>2</sub>-induced mitophagic flux  
216 relative to identically treated wild-type mt-Keima cells (Figure 3C, Supplemental Figure 3A).  
217 Finally, overexpression of PPTC7 in *Pptc7* KO MEFs rescued basal BNIP3 protein expression to  
218 levels seen in wild-type MEFs (Supplemental Figure 3B). Collectively, these data show that  
219 overexpressed PPTC7 limits BNIP3 protein expression and mitophagy induction in both wild-type  
220 and *Pptc7* KO cells.

221 As these experiments indicated that overexpressed PPTC7 was properly localized and  
222 functional, we generated a series of mutants to understand the mechanism by which PPTC7 limits  
223 BNIP3 and NIX accumulation. PPTC7 consists of a PP2C phosphatase domain that is preceded  
224 by a predicted 38-residue disordered N-terminus (Figure 3C), which includes a mitochondrial  
225 targeting sequence (i.e., MTS) that is processed at amino acid 14 (Calvo *et al*, 2017). Interestingly,  
226 when western blotting for overexpressed PPTC7, we found that the protein ran as a doublet, while  
227 a  $\Delta$ MTS-PPTC7 mutant ran at the same molecular weight as the bottom band (Figure 3D),  
228 suggesting that wild-type PPTC7 expressed as both a full-length and processed form. Given these  
229 molecular insights, we used this overexpression system to test the necessity of PPTC7 catalytic  
230 activity and mitochondrial targeting in suppressing BNIP3 and NIX induction under pseudohypoxia.

231 We first mutated the PP2C phosphatase domain of PPTC7 at a key catalytic residue, D78.  
232 We previously demonstrated that recombinant PPTC7 D78A was unable to dephosphorylate  
233 BNIP3 and NIX on mitochondria isolated from *Pptc7* KO MEFs (Niemi *et al*, 2023). Consistently,  
234 recombinant wild-type PPTC7, but not D78A PPTC7, caused a collapse in the laddering pattern  
235 of monomeric BNIP3 in mitochondria isolated from wild-type and *PPTC7* knockout 293T cells  
236 (Supplemental Figure 3C). These data show that not only that PPTC7 D78A lacks catalytic activity,  
237 but also that the upper monomeric bands seen on BNIP3 western blots represent phosphorylated  
238 intermediates that can be directly dephosphorylated by PPTC7. While the D78A mutant lacks  
239 phosphatase activity, mutation of PPTC7 D78 may also disrupt its physical interaction with BNIP3  
240 or NIX, as AlphaFold2 multimer models indicate that BNIP3 and NIX dock to PPTC7 proximal to  
241 D78 (Supplemental Figures 3D,E). Via either mechanism, we predicted that a D78A mutant would  
242 be unable to suppress BNIP3 and NIX accumulation during pseudohypoxia. We overexpressed  
243 wild-type and D78A PPTC7 in HeLa FLP-IN T-REx cells and found that both constructs were  
244 doxycycline-induced to similar extents and, interestingly, also expressed at higher levels in the  
245 presence of CoCl<sub>2</sub>, similar to BNIP3 and NIX (Figure 3F). While overexpression of wild-type  
246 PPTC7 decreased BNIP3 and NIX accumulation in response to CoCl<sub>2</sub> treatment, the D78A mutant  
247 failed to suppress the induction of these mitophagy receptors (Figure 3F), indicating that PPTC7  
248 requires an intact catalytic motif to influence BNIP3 and NIX.

249 We next examined whether disrupting the mitochondrial localization of PPTC7 would  
250 affect its ability to suppress CoCl<sub>2</sub>-induced BNIP3 and NIX levels. We overexpressed the  $\Delta$ MTS-  
251 PPTC7 construct HeLa FLP-IN T-REx cells, hypothesizing that it would fail to influence CoCl<sub>2</sub>-  
252 induced BNIP3 and NIX expression due to its inability to target to mitochondria. Surprisingly, we  
253 found that  $\Delta$ MTS-PPTC7 fully suppressed CoCl<sub>2</sub>-mediated NIX accumulation, and partially

254 suppressed BNIP3 accumulation (Figure 3G). This rescue of BNIP3 and NIX expression is  
255 consistent with a model in which a non-targeted PPTC7 can influence mitophagy at sufficient (i.e.,  
256 overexpressed) levels. This, in combination with the fact that wild-type PPTC7 runs as a doublet,  
257 suggested that PPTC7 may exist in two populations: one outside of mitochondria (e.g., a full  
258 length, unprocessed form) and one that localizes to the mitochondrial matrix (e.g.,  $\Delta$ MTS-PPTC7,  
259 which lacks its mitochondrial targeting sequence upon processing after import). If true, full length  
260 PPTC7 may reside outside of mitochondria prior to its import, placing it proximal to BNIP3 and  
261 NIX. We thus hypothesized that artificially anchoring PPTC7 to the outer mitochondrial membrane  
262 (OMM) would block BNIP3 and NIX accumulation in response to pseudohypoxia. We engineered  
263 a  $\Delta$ MTS-PPTC7-OMP25 construct that both lacks an MTS and is fused to OMP25, a C-terminal  
264 tail anchored protein that targets to the OMM (Horie *et al*, 2002). Consistent with our hypothesis,  
265  $\Delta$ MTS-PPTC7-OMP25 blunts the accumulation of BNIP3 and NIX under both basal and  $\text{CoCl}_2$ -  
266 treated conditions (Figure 3H), suggesting an OMM-localized pool of PPTC7 influences BNIP3  
267 and NIX protein expression. Collectively, these data show that PPTC7 requires an intact active  
268 site but not its mitochondrial targeting sequence to suppress BNIP3 and NIX expression in  
269 pseudohypoxic conditions, consistent with a role for PPTC7 in regulating these mitophagy  
270 receptors outside of mitochondria.

271

### 272 **PPTC7 proximally and dynamically interacts with BNIP3 and NIX in cells**

273

274 Our data demonstrating that anchoring PPTC7 to the OMM blunts BNIP3 and NIX accumulation  
275 (Figure 3H) indicates that a pool of PPTC7 may reside outside of mitochondria to directly interact  
276 with BNIP3 and NIX to promote their proteasomal turnover. We sought to test this model by  
277 determining whether BNIP3 and NIX interact with PPTC7 in cells through miniTurbo-based  
278 proximity labeling experiments. We expressed PPTC7-V5-miniTurbo, as well as two control  
279 constructs, in 293T cells with or without DFO treatment. We treated half of the samples with  
280 exogenous biotin (which facilitates miniTurbo-based proximity labeling) and left the remaining  
281 cells untreated to control for potential non-specific interactions. After biotinylation, we lysed cells,  
282 performed a pull-down with streptavidin beads to enrich for biotinylated proximal interactors, and  
283 probed for an interaction with BNIP3 and NIX via western blot. While V5-PPTC7-miniTurbo  
284 expressed equally across all conditions, the streptavidin pull-down revealed interactions with  
285 BNIP3 and NIX only in the biotin-treated samples, demonstrating specific proximal labeling  
286 (Figure 4A). Importantly, these interactions were also specific to PPTC7-V5-miniTurbo and were  
287 not seen in either vector only or V5-miniTurbo control samples (Figure 4A). These data, combined  
288 with our data demonstrating that recombinant PPTC7 can directly dephosphorylate BNIP3 *in vitro*  
289 (Supplemental Figure 2D), strongly suggest that PPTC7 directly interacts with BNIP3 and NIX  
290 within the native cellular environment.

291 These data support a model in which PPTC7 is directly recruited to BNIP3 and NIX to  
292 promote their turnover. Our DFO washout experiments offer insights into the kinetics of this  
293 turnover, which allowed us to test whether the PPTC7-BNIP3/NIX interactions are dynamic  
294 throughout the turnover process. Our experiments show that BNIP3 is present at near peak levels  
295 4 hours post-DFO washout (Figures 2B, C), leading us to hypothesize that PPTC7 would have  
296 enhanced recruitment to BNIP3 and NIX during acute DFO washout to facilitate the turnover of  
297 BNIP3 and NIX. To test this, we repeated proximity labeling of PPTC7-V5-miniTurbo under  
298 conditions of acute (i.e., 4 hour) DFO washout. Interestingly, while the PPTC7-BNIP3/NIX  
299 interactions are enriched upon 24 hours of DFO treatment, similar to our previous experiment,  
300 they are further enhanced upon acute 4-hour DFO washout (Figure 4B). These data show that  
301 PPTC7 is dynamically recruited to BNIP3 and NIX to promote their turnover upon resolution of  
302 DFO-mediate pseudohypoxia.

303 To further explore the dynamic nature of the PPTC7-BNIP3 interaction, we exploited the  
304 recent observation that BNIP3 enriches at LC3-positive punctate structures which likely represent

nascent mitophagosomes (Gok *et al*, 2023). We hypothesized that PPTC7 would also enrich at these punctate structures under conditions of pseudohypoxia, and that this localization would be enriched upon resolution of pseudohypoxia. We overexpressed PPTC7-GFP in U2OS cells treated with the iron chelator deferiprone (DFP) for 24 hours, and then fixed and immunolabeled for BNIP3 and TOMM20. Examination of over 400 BNIP3-enriched foci in DFP-treated cells revealed that ~14% of these structures were co-enriched for PPTC7-GFP (Figure 4C). Importantly, these foci were co-localized with the mitochondrial marker TOMM20 (Figure 4C), demonstrating these interactions occur at mitochondria and not other organelles, such the ER, where BNIP3 has been reported to localize (Zhang *et al*, 2009; Hanna *et al*, 2012). Remarkably, we found that PPTC7-GFP showed almost a three-fold increase co-enrichment (~46%) with BNIP3-enriched foci 4 hours after DFP washout relative to DFP treatment alone (Figure 4D). These data, along with our proximity labeling experiments, suggest that PPTC7 is actively recruited to BNIP3 and NIX under conditions that promote their turnover. Collectively, our data are consistent with a model in which a pool of PPTC7 dynamically localizes outside of mitochondria to associate with BNIP3 and NIX—likely through a direct interaction—to promote their ubiquitin-mediated turnover.

320

## 321 Discussion

322

PPTC7 is one of twelve phosphatases that localize to mammalian mitochondria (Niemi & Pagliarini, 2021). Conserved through budding yeast (where it is named Ptc7p), PPTC7 has been linked to the maintenance of metabolism and mitochondrial homeostasis across organisms (Martín-Montalvo *et al*, 2013; Guo *et al*, 2017a, 2017b; Gonzalez-Mariscal *et al*, 2017; González-Mariscal *et al*, 2018; Niemi *et al*, 2019, 2023). While we previously have performed phosphoproteomics to identify candidate substrates of Ptc7p (Guo *et al*, 2017a, 2017b) and PPTC7 (Niemi *et al*, 2019, 2023), the precise roles of these phosphatases in regulating mitochondrial homeostasis remain unclear. In this study, we begin to illuminate important aspects underlying the regulation and function of PPTC7 and how this phosphatase influences BNIP3- and NIX-mediated mitophagy.

The data presented in this study demonstrate that BNIP3 and NIX turnover is a tightly regulated and highly dynamic process. Using a model of DFO-mediated iron chelation followed by compound washout, we show that endogenous BNIP3 and NIX rapidly turn over in wild-type cells in a manner that is slowed by proteasomal inhibition. Our data further show that BNIP3 and NIX have longer half-lives and are less responsive to proteasomal inhibition in *PPTC7* KO cells, consistent with a model in which the phosphatase functions to promote the ubiquitin-mediated turnover of these mitophagy receptors. Indeed, a study published during the preparation of this manuscript showed that PPTC7 coordinates BNIP3 and NIX degradation by acting as a molecular scaffold for the E3 ligase FBXL4 (Sun *et al*, 2023) at the outer mitochondrial membrane. Consistently, we find that PPTC7 does not require its mitochondrial targeting sequence to suppress BNIP3 and NIX accumulation, and anchoring PPTC7 on the outer mitochondrial membrane decreases BNIP3 and NIX protein levels under pseudohypoxia. Furthermore, we find that PPTC7 associates with BNIP3 and NIX via proximity labeling experiments, demonstrating a likely direct interaction between the phosphatase and these mitophagy receptors in cells. These data indicate that PPTC7 has meaningful functions at the outer mitochondrial membrane to regulate BNIP3- and NIX-mediated mitophagy.

The apparent dual functionality of PPTC7 across mitochondrial compartments leads to interesting questions regarding its regulation. The data in this study indicate that PPTC7 is actively recruited to BNIP3 and NIX to promote their degradation, as the proximal interactions between PPTC7 and BNIP3/NIX are enriched upon resolution of pseudohypoxia (i.e., the washout of iron chelator). This conclusion is further supported by the enhanced colocalization of fluorescently tagged PPTC7 with BNIP3-positive punctae in cells in conditions of iron chelator washout. These data suggest not only a model of dynamic recruitment, but also a precisely coordinated spatial

355

356 organization of BNIP3 and PPTC7 at foci that likely represent mitophagosome formation sites  
357 (Gok *et al*, 2023). Interestingly, TMEM11 was also found to co-localize with BNIP3 and NIX at  
358 mitophagic punctae, and its knockout increases both BNIP3-positive foci as well as mitophagic  
359 flux (Gok *et al*, 2023). These data suggest that PPTC7 and TMEM11 may function in similar  
360 complexes to regulate BNIP3 and NIX mediated turnover and/or mitophagy. Whether these  
361 complexes include FBXL4 and how they may actively remodel to promote or limit mitophagy are  
362 key questions regarding the dynamic regulation of BNIP3- and NIX-mediated mitophagy.

363 Previous studies of *Fbxl4* and *Pptc7* knockout mouse models show that each display similar  
364 pathophysiological profiles, including metabolic dysfunction, broad loss of mitochondrial protein  
365 levels, and perinatal lethality. Importantly, knockout of *Bnip3* and *Nix* alleviates many of these  
366 phenotypes in cells (Cao *et al*, 2023; Elcocks *et al*, 2023; Nguyen-Dien *et al*, 2023; Niemi *et al*,  
367 2023) and mice (Cao *et al*, 2023; Sun *et al*, 2023), suggesting that loss of *Fbxl4* or *Pptc7* drives  
368 excessive BNIP3- and NIX-mediated mitophagy. Despite these advances, the precise mechanism  
369 by which PPTC7 influences BNIP3 and NIX protein levels remain unclear. We previously found  
370 that BNIP3 and NIX are hyperphosphorylated in *PPTC7* knockout cells and tissues, suggesting  
371 PPTC7 may influence mitophagy via their dephosphorylation (Niemi *et al*, 2019, 2023). Indeed,  
372 phosphorylation of BNIP3 and NIX can enhance their stability or their ability to induce mitophagy  
373 (He *et al*, 2022; Poole *et al*, 2021; Zhu *et al*, 2013; Rogov *et al*, 2017), suggesting  
374 dephosphorylation may be required to suppress their activity. However, Sun *et al.* suggest that  
375 PPTC7 promotes BNIP3 and NIX degradation independent of its phosphatase activity, as retains  
376 its ability to limit BNIP3 and NIX accumulation in the presence of cadmium, a PP2C phosphatase  
377 inhibitor (Sun *et al*, 2023). Interestingly, however, their data demonstrate that an inactive PPTC7  
378 mutant (D78A/G79A) cannot suppress BNIP3 and NIX accumulation or mitophagy induction,  
379 which is consistent with our data demonstrating that D78A PPTC7 neither dephosphorylates  
380 BNIP3 *in vitro*, nor blocks BNIP3 and NIX accumulation in conditions of pseudohypoxia (Figure  
381 3). One possible explanation for this discrepancy is that PPTC7 may directly bind to BNIP3 and  
382 NIX within its active site, consistent with AlphaFold multimer models (Supplemental Figure 3). If  
383 so, mutation of the PPTC7 active site could disallow BNIP3 and NIX binding independent of its  
384 catalytic activity. Alternatively, it is possible that cadmium does not completely block PPTC7 in  
385 cells, allowing low level phosphatase activity that can facilitate BNIP3 and NIX degradation.  
386 Careful dissection of the mechanisms by which the D78A mutation PPTC7 limits BNIP3- and NIX-  
387 mediated mitophagy, as well as how phosphorylation affects BNIP3 and NIX stability or activity  
388 should be active areas of investigation in the future.

389 Collectively, our data reveal an unexpected role for the mitochondrial protein phosphatase  
390 PPTC7 in the regulation of receptor-mediated mitophagy at the outer mitochondria membrane.  
391 While knockout of BNIP3 and NIX largely rescue the decreases in mitochondrial protein levels  
392 present in *Pptc7* KO tissues and cells, their collective knockout fails to fully rescue metabolic  
393 defects seen in *Pptc7* KO cells (Niemi *et al*, 2023). This, together with our data indicating PPTC7  
394 exists in two distinct pools in cells, suggests that PPTC7 regulates additional mitochondrial  
395 functions within the matrix. It is possible that PPTC7 mediates such functions by influencing the  
396 mitophagic selectivity of matrix-localized substrates, as occurs in yeast (Tal *et al*, 2007; Abeliovich  
397 *et al*, 2013; Kolitsida *et al*, 2019, 2023). Alternatively, it is possible that PPTC7 maintains  
398 mitochondrial metabolism completely independent of its role in mitophagic signaling, potentially  
399 through the regulation of one or more candidate substrates previously identified via  
400 phosphoproteomic analyses (Niemi *et al*, 2019, 2023). Disentangling the matrix-mediated  
401 functions of PPTC7 versus those that regulate functions outside of mitochondria, and how these  
402 ultimately relate to mitophagic flux, will be a key next step in understanding the role of this  
403 phosphatase in modulating mitochondrial homeostasis.

404  
405  
406



407 **Acknowledgements**

408

409 We thank Edrees Rashan, Keshav Kailash, Michael McKenna, and the Niemi Laboratory for  
410 careful reading of the manuscript and for helpful discussions on this work. We thank Julia Pagan  
411 and Keri-Lyn Kozul (University of Queensland, Australia) for key resources and for important  
412 discussions related to this manuscript. We thank the Flow Cytometry and Fluorescence-Activated  
413 Cell Sorting Core at Washington University School of Medicine for equipment and support for the  
414 flow cytometry experiments. This work was supported by R35GM151130 (to N.M.N.) and  
415 R35GM137894 (to J.R.F.). The UT Southwestern Quantitative Light Microscopy Facility, which is  
416 supported in part by NIH P30CA142543, provided access to the Nikon SoRa microscope  
417 (purchased with NIH 1S10OD028630-01). L.W. was supported by the MilliporeSigma Predoctoral  
418 Fellowship in Honor of Dr. Gerty T. Cori at Washington University. J.S. was supported through  
419 the Summer Undergraduate Research Program put on within the Department of Biochemistry and  
420 Molecular Biophysics at Washington University School of Medicine in St. Louis.

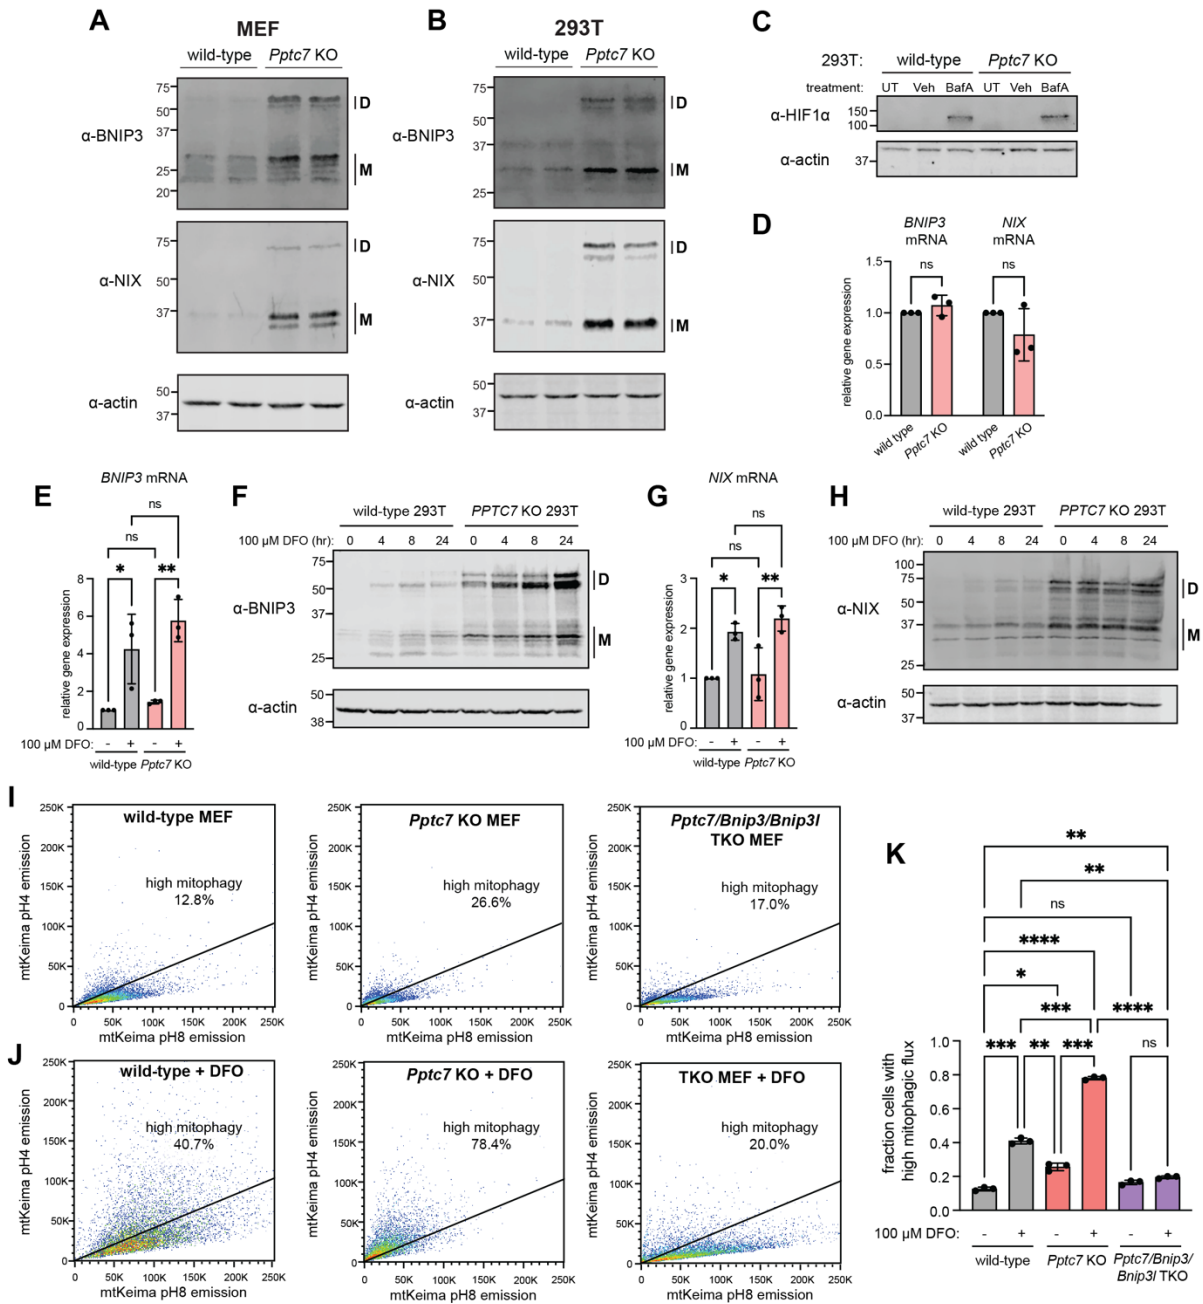

422 **Figure 1: *BNIP3* and *NIX* are upregulated post-transcriptionally and independent of *HIF-1α* in**  
423 ***PPTC7* KO cells. **A.**, **B.** Western blots of *BNIP3* (top panels), *NIX* (middle panels) and actin**  
424 **(serving as a load control, bottom panels) in wild-type or *Pptc7* knockout (KO) mouse embryonic**  
425 **fibroblasts (MEF, **A.**) or in wild-type or *PPTC7* KO 293T cells (**B.**). “D” indicates dimer species;**  
426 **“M” indicates monomer species. **C.** Western blot for *HIF-1α* in untreated (UT), vehicle only (veh,**  
427 **0.2% DMSO) or 100 nM bafilomycin A (BafA) for 16 hours in wild-type and *PPTC7* KO 293T cells.**  
428 **Actin shown as a loading control. **D.** qRT-PCR of *BNIP3* and *NIX* endogenous mRNA levels in**  
429 **wild-type (gray) and *PPTC7* KO (pink) 293T cells. **E.** qRT-PCR of *BNIP3* RNA levels in untreated**  
430 **and DFO-treated (100 μM, 24 hours) wild-type (gray) and *PPTC7* KO (pink) 293T cells. \*\*p<0.01,**  
431 **\*p<0.05, ns = not significant, Ordinary one-way ANOVA. Error bars represent standard deviation;**  
432 **data points represent independent experiments. **F.** Western blotting for endogenous *BNIP3* levels**  
433 **in wild-type or *PPTC7* KO 293T cells treated with 100 μM DFO for indicated times. Actin shown**  
434 **as a loading control. **G.** qRT-PCR of *NIX* RNA levels in untreated and DFO-treated (100 μM, 24**  
435 **hours) wild-type (gray) and *PPTC7* KO (pink) 293T cells. \*\*p<0.01, \*p<0.05, ns = not significant,**  
436 **Ordinary one-way ANOVA. Error bars represent standard deviation; data points represent**  
437 **independent experiments. **H.** Western blotting for endogenous *NIX* levels in wild-type or *PPTC7***  
438 **KO 293T cells treated with 100 μM DFO for indicated times. Actin shown as a loading control. **I.****  
439 **FACS histograms of basal mitophagy in wild-type (left), *Pptc7* KO (middle) and *Pptc7/Bnip3/Nix***  
440 **TKO MEFs using the mt-Keima fluorescence assay. Cells undergoing high mitophagy are above**  
441 **the diagonal line; percentages indicated in figure. **J.** FACS histograms of mitophagy rates upon**  
442 **24 hours of 100 μM DFO treatment in wild-type (left), *Pptc7* KO (middle) and *Pptc7/Bnip3/Nix***  
443 **TKO MEFs using the mt-Keima fluorescence assay. **K.** Quantification of mt-Keima data shown in**  
444 **I., J. \*\*\*\*p<0.0001, \*\*\*p<0.001, \*\*p<0.01, \*p<0.05, ns = not significant, Ordinary one-way ANOVA.**  
445 **Error bars represent standard deviation; data points represent individual biological replicates.**  
446

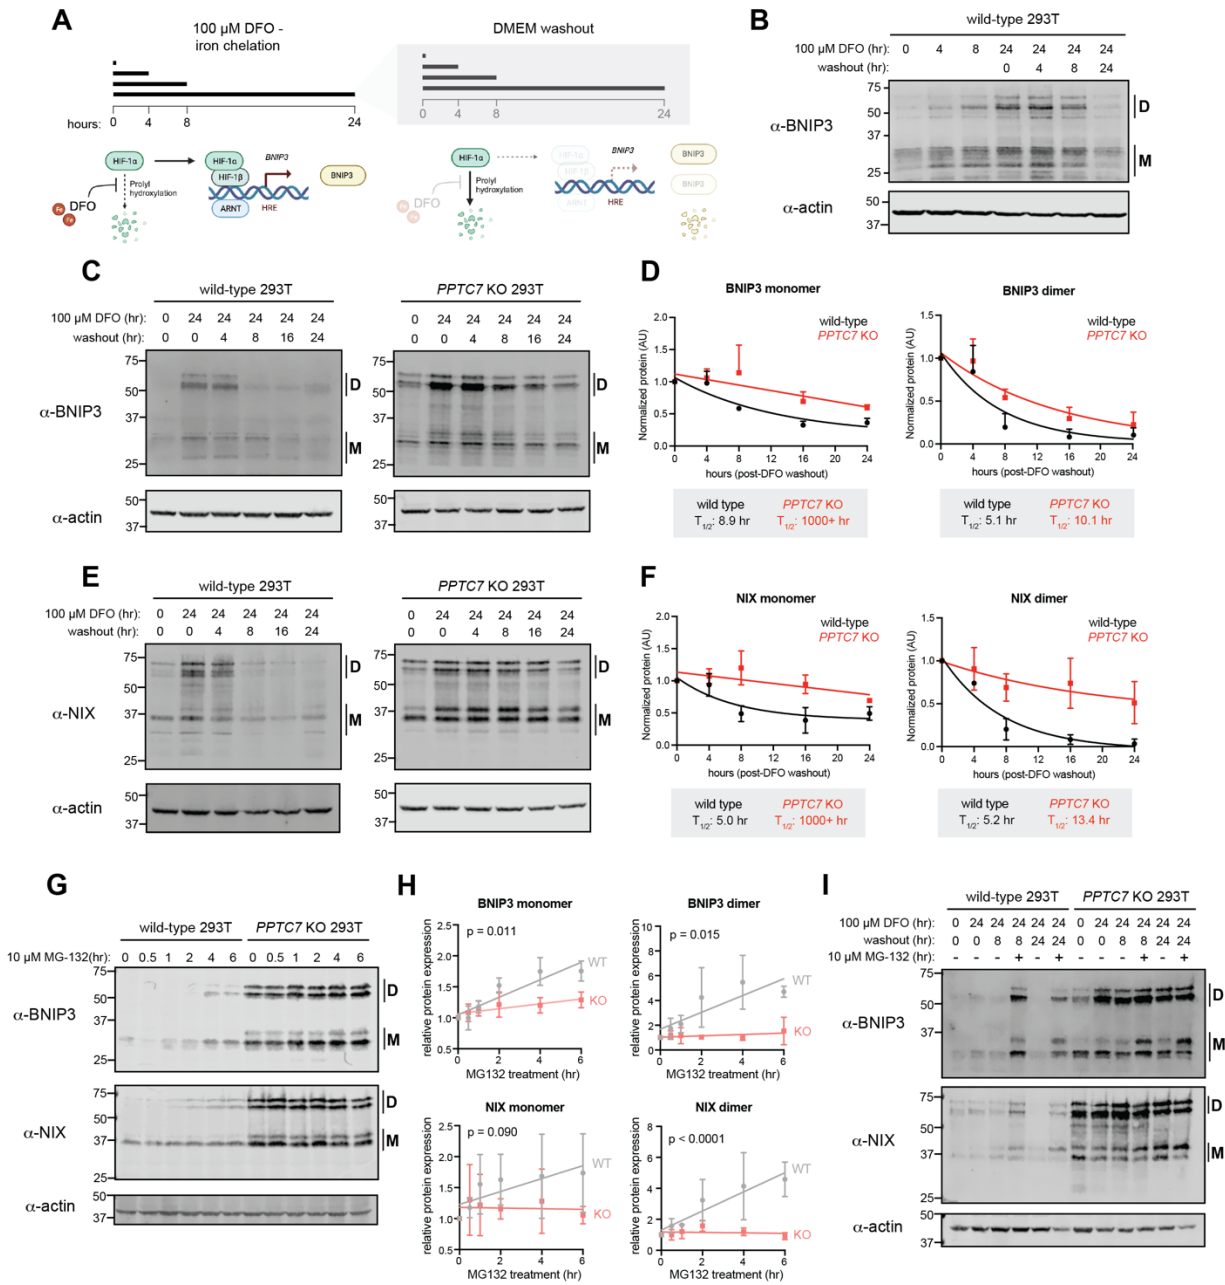

448 **Figure 2:** *BNIP3 and NIX have decreased turnover rates and are less responsive to proteasomal*  
449 *inhibition in PPTC7 KO cells.* **A.** Schematic of DFO treatment and washout timeline and  
450 mechanism. **B.** Western blot of endogenous BNIP3 protein after indicated times of DFO treatment  
451 and washout, when applicable. “D” indicates dimer species; “M” indicates monomer species. Actin  
452 shown as a loading control. **C.** Western blot of endogenous BNIP3 protein after indicated times  
453 of DFO treatment and washout in wild-type (left panel) and *PPTC7* KO (right panel) 293T cells.  
454 “D” indicates dimer species; “M” indicates monomer species. Actin shown as loading control. **D.**  
455 Quantification of data shown in C. BNIP3 monomer (left graph) or dimer (right graph) bands were  
456 quantified using densitometry, averaged, and plotted over time. Data were fit with a one phase  
457 decay model to calculate protein half-lives ( $T_{1/2}$ ), which are shown below each graph. Error bars  
458 represent standard deviations of normalized densitometry across three independent experiments.  
459 **E.** Western blot of endogenous NIX protein after indicated times of DFO treatment and washout  
460 in wild-type (left panel) and *PPTC7* KO (right panel) 293T cells. “D” indicates dimer species; “M”  
461 indicates monomer species. Actin shown as loading control. **F.** Quantification of data shown in  
462 E. NIX monomer (left graph) or dimer (right graph) bands were quantified using densitometry,  
463 averaged, and plotted over time. Data were fit with a one phase decay model to calculate protein  
464 half-lives ( $T_{1/2}$ ), which are shown below each graph. Error bars represent standard deviations of  
465 normalized densitometry across three independent experiments. **G.** Western blots of endogenous  
466 BNIP3 (top panel) and NIX (bottom panel) in wild-type and *PPTC7* KO 293T cells upon treatment  
467 with 10  $\mu$ M MG-132 for the indicated timeframes. “D” indicates dimer species; “M” indicates  
468 monomer species. Actin shown as a loading control. **H.** Quantification of BNIP3 and NIX monomer  
469 (left graphs) and dimer (right graphs) populations in wild-type (gray) and *PPTC7* KO (pink) cells  
470 shown in G. Bands were quantified using densitometry, averaged, and plotted over time. Data  
471 were analyzed via linear regression, and significance between slopes was calculated using  
472 Analysis of Covariance (ANCOVA). **I.** Western blot of endogenous BNIP3 and NIX proteins in  
473 wild-type and *PPTC7* KO cells after DFO treatment and subsequent washout in the presence or  
474 absence of 10  $\mu$ M MG-132. “D” indicates dimer species; “M” indicates monomer species. Actin  
475 shown as a loading control.  
476

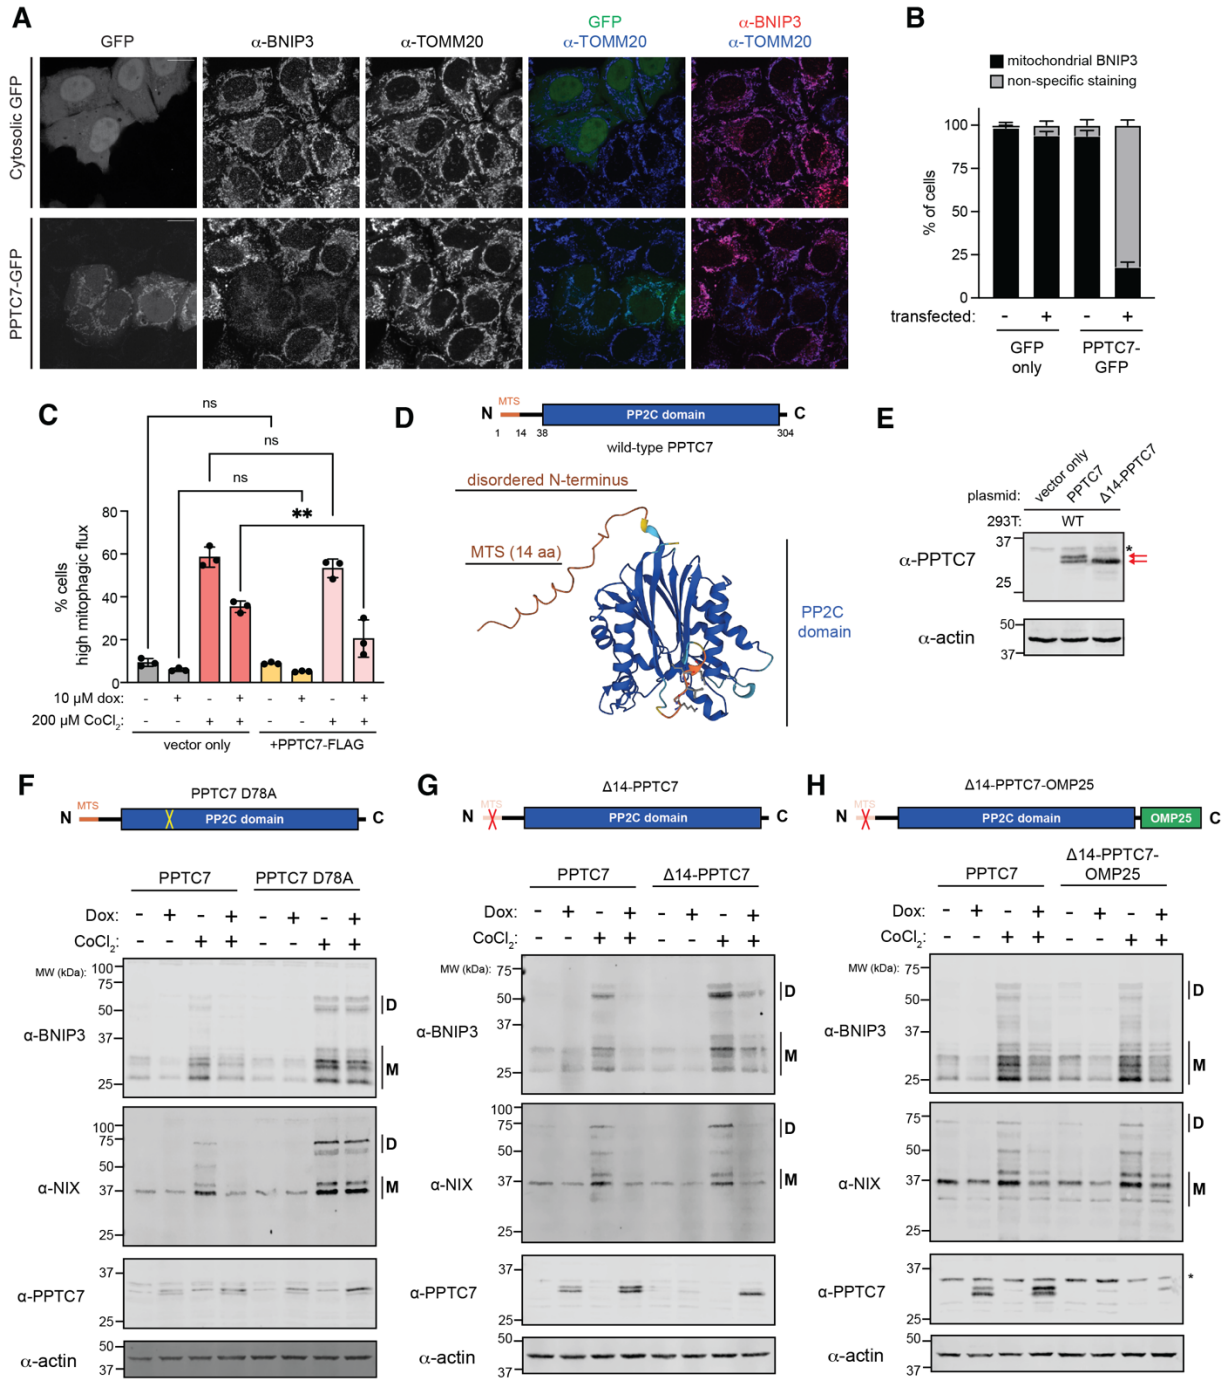

478 **Figure 3: PPTC7 requires an intact catalytic motif but not mitochondrial targeting to suppress**  
479 **BNIP3 and NIX accumulation. A.** Representative single plane confocal images of GFP only (top  
480 panels) or PPTC7-GFP (bottom panels) expressed in HeLa cells treated for 12 hours with 500  
481  $\mu\text{M}$   $\text{CoCl}_2$ . Cells were stained for BNIP3 (second column) or TOMM20 (third column). Overlays  
482 are shown for GFP and TOMM20 (fourth column) and GFP and BNIP3 (fifth column). Scale bar  
483 = 20  $\mu\text{m}$ . **B.** Quantification of data shown in A, mitochondrial BNIP3 staining versus non-specific  
484 staining in cells overexpressing GFP only or PPTC7-GFP versus matched untransfected controls  
485 for each experiment. Error bars represent standard error of the mean of three independent  
486 experiments. **C.** Quantification of mt-Keima positive mitophagic flux in HeLa FLP-IN TRex cells  
487 expressing vector only (left) or PPTC7-FLAG in the presence of 10  $\mu\text{M}$  doxycycline (dox, to  
488 promote PPTC7 expression), 200  $\mu\text{M}$  cobalt chloride ( $\text{CoCl}_2$ ), or both. \*\* $p < 0.01$ , ns = not  
489 significant, ordinary one-way ANOVA. Error bars represent standard deviation. Each dot  
490 represents an independent biological replicate. **D.** Schematic of PPTC7 features, including a  
491 mitochondrial targeting sequence (MTS) and PP2C phosphatase domain, top. Bottom,  
492 AlphaFold2 representation of PPTC7 structure; predicted disordered N-terminus and PP2C  
493 phosphatase domains indicated. **E.** Western blot of 293T cells overexpressing PPTC7 or a  $\Delta\text{MTS}$ -  
494 PPTC7 mutant. Red arrows indicate dual species in wild-type PPTC7 expression. \* represents a  
495 non-specific band. Actin shown as a loading control. **F.-H.** Western blots of BNIP3, NIX, and  
496 PPTC7 depicting the ability of various mutants of PPTC7 to suppress BNIP3 and NIX  
497 accumulation in response to  $\text{CoCl}_2$  treatment. “D” indicates dimer species, “M” indicates  
498 monomer species. In F, a catalytic mutant of PPTC7, D78A, cannot effectively suppress BNIP3  
499 and NIX accumulation relative to wild-type PPTC7. In G, the  $\Delta\text{MTS}$ -PPTC7 mutant partially or  
500 fully suppresses BNIP3 and NIX accumulation, respectively. In H, a mutant that artificially anchors  
501 PPTC7 to the outer mitochondrial membrane,  $\Delta\text{MTS}$ -PPTC7-OMP25, suppresses BNIP3 and NIX  
502 accumulation. Actin shown as a loading control.  
503

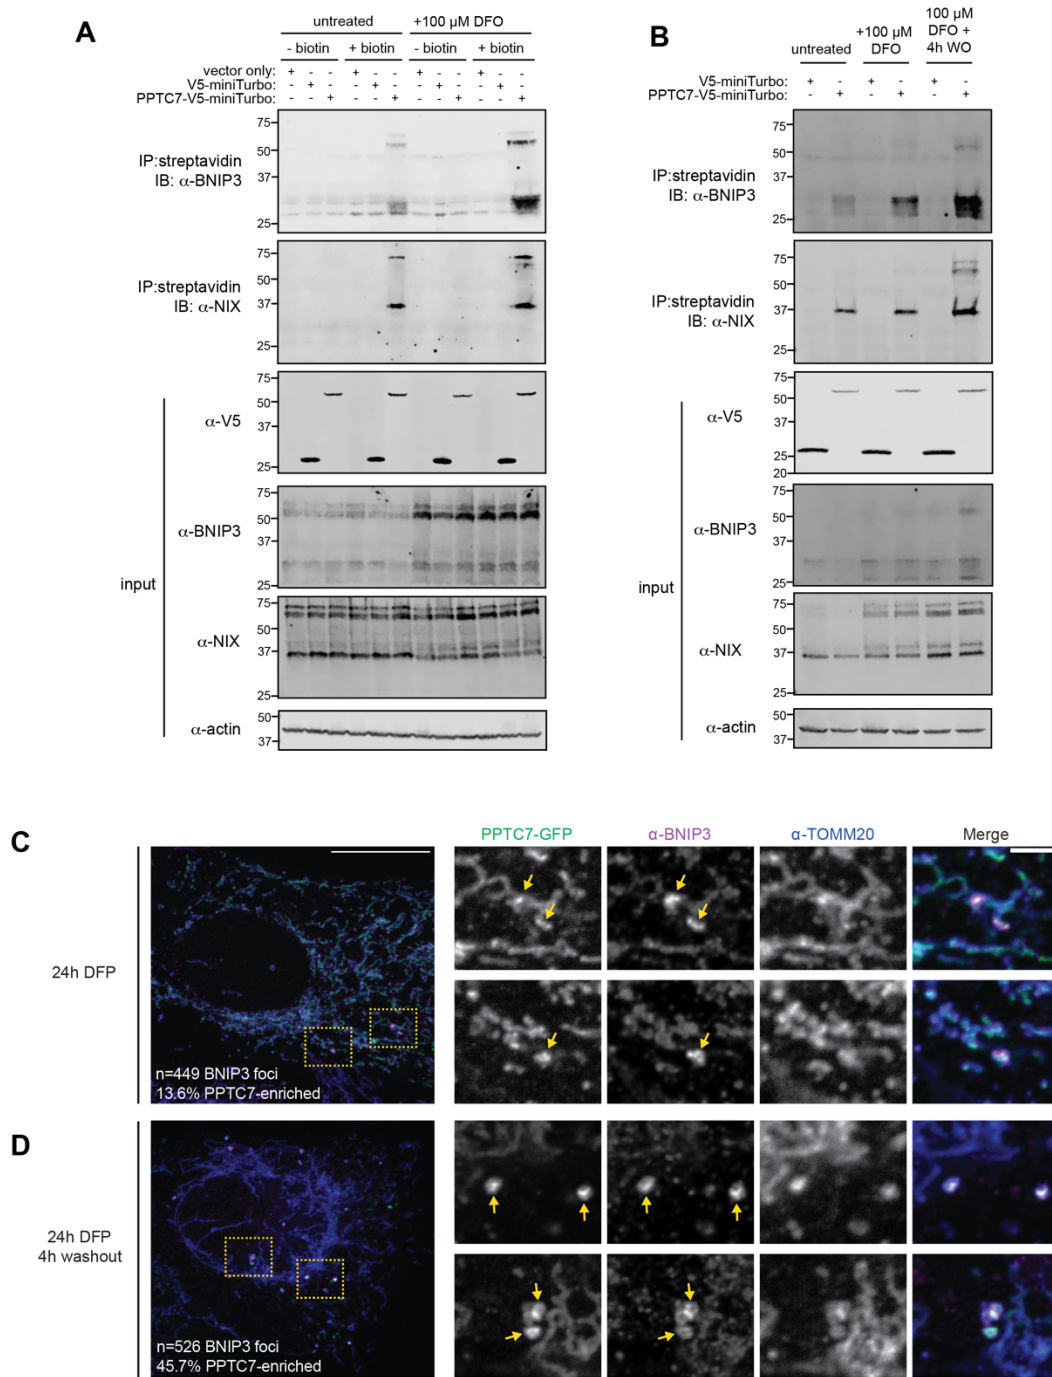



505 **Figure 4:** *PPTC7 proximally and dynamically interacts with BNIP3 and NIX in cells.* **A.** Proximity  
506 labeling of PPTC7-V5-miniTurbo in 293T cells with or without 24-hour deferoxamine (DFO)  
507 treatment. PPTC7-V5-miniTurbo, as well as vector only or V5-miniTurbo only controls, were  
508 transfected into 293T cells. Streptavidin pulldowns were used to enrich for PPTC7-V5-miniTurbo  
509 interactors, which were run on SDS-PAGE gels and western blotted for BNIP3 (top blot) or NIX  
510 (2<sup>nd</sup> blot). Only PPTC7-V5-miniTurbo + biotin samples pulled down BNIP3 and NIX (lanes 6 and  
511 12, streptavidin pull down gels), indicating specific binding. Western blots shown for reaction input  
512 for pulldowns for V5 (showing miniTurbo constructs), BNIP3, NIX, and actin (serving as a load  
513 control). **B.** Proximity labeling of PPTC7-V5-miniTurbo in 293T cells with after 24-hour DFO  
514 treatment with or without 4 hour DFO washout. Streptavidin pulldowns were used to enrich for  
515 PPTC7-V5-miniTurbo interactors as described in A. Western blots shown for reaction input for  
516 pulldowns as described in A. **C.** A representative maximum z-projection confocal image (left) and  
517 corresponding single plane insets (right) are shown of a U2OS cell overexpressing PPTC7-GFP  
518 and treated with deferiprone (DFP) for 24 hours. Cells were fixed and stained for BNIP3 and  
519 TOMM20 to visualize co-enrichment of PPTC7 with BNIP3-enriched foci (n=449). **D.** As in C for  
520 a cells treated for 24h with DFP and washed for an additional 4h prior to fixation. Cells were  
521 stained to visualize co-enrichment of PPTC7 with BNIP3-enriched foci (n=526).  
522

## Supplemental Figure 1

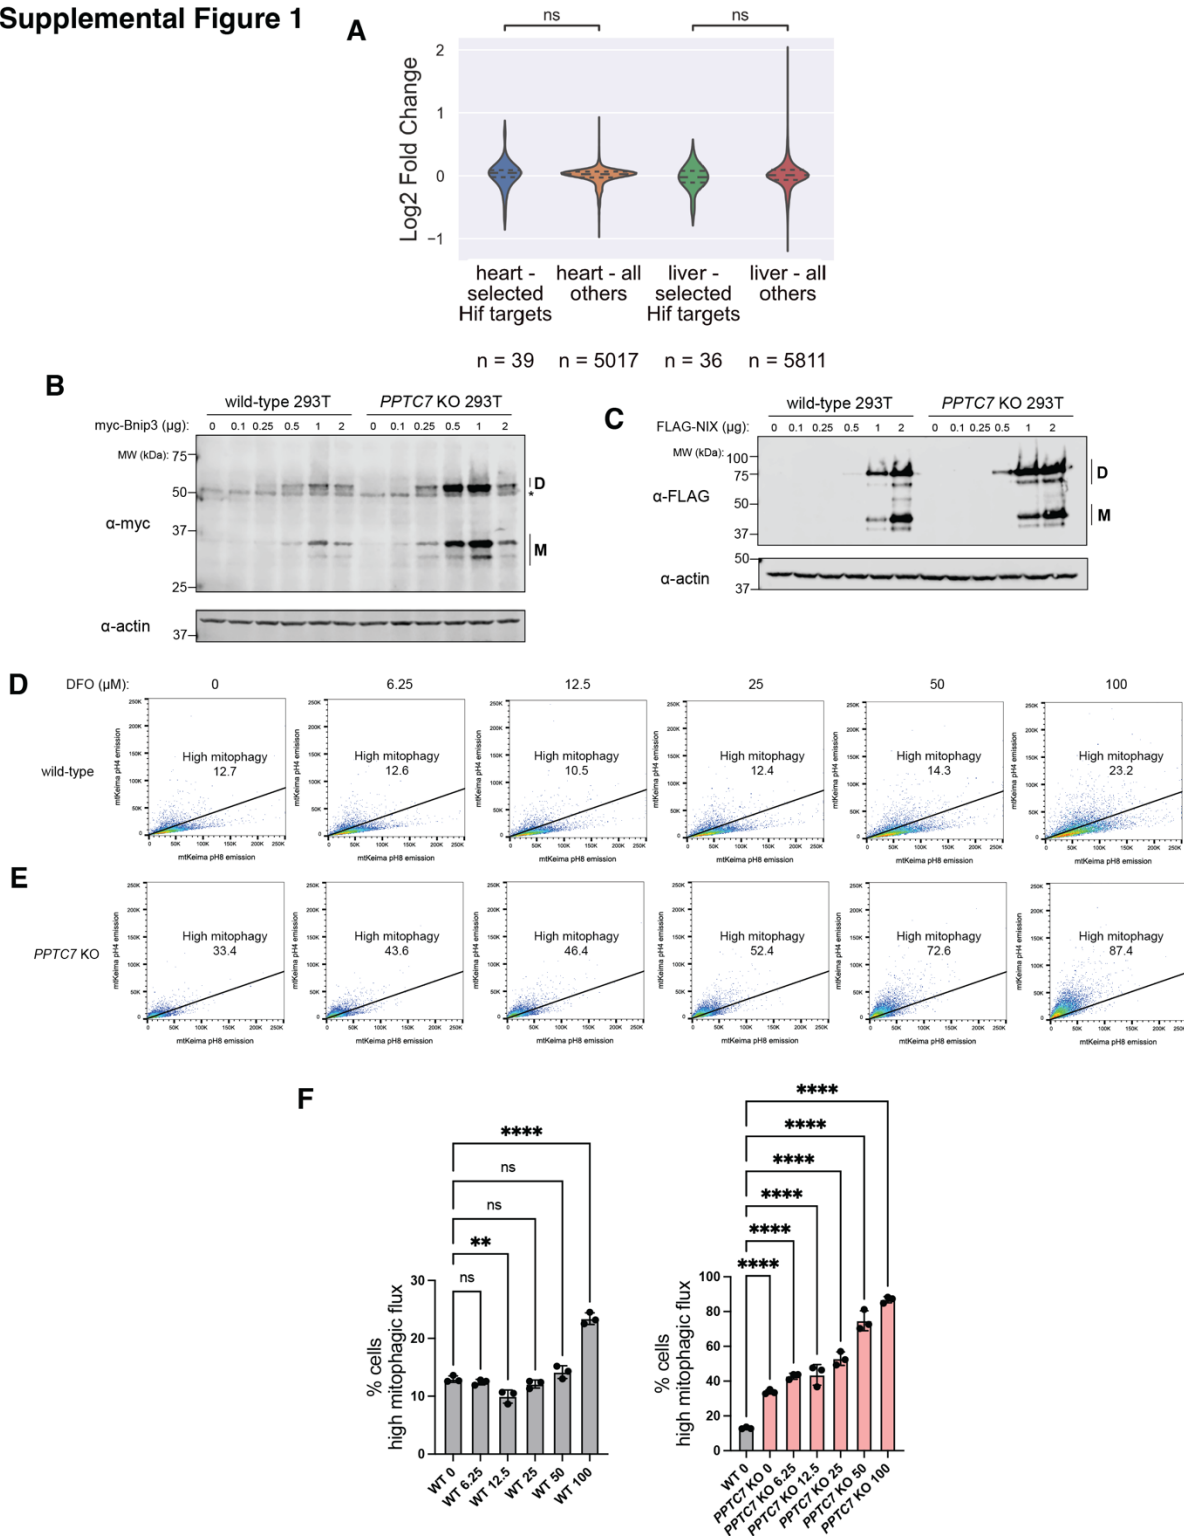

524 **Supplemental Figure 1. A.** Analysis of select HIF responsive targets in *Pptc7* KO heart and liver  
525 proteomics datasets collected in Niemi et al., Nat Commun, 2019. **B.,C.** Western blots of  
526 exogenous BNIP3 (B) or NIX (C) expressed in wild-type of *PPTC7* KO 293T cells at various  
527 plasmid concentrations. “D” indicates dimer species, “M” indicates monomer species. Actin shown  
528 as a loading control. **D., E.** Histograms of FACS analysis of mt-Keima positive wild-type (D) and  
529 *Pptc7* KO (E) MEFs showing high mitophagy rates in response to variable DFO concentrations.  
530 **F.** Statistical analysis of data shown in D., E., grey bars = wild-type samples, pink bars = *Pptc7*  
531 KO samples. \*\*\*\* $p < 0.0001$ , \*\*\* $p < 0.001$ , \*\* $p < 0.01$ , ns = not significant, ordinary one-way ANOVA.  
532 Error bars represent standard deviation, data points represent individual biological replicates.

## Supplemental Figure 2

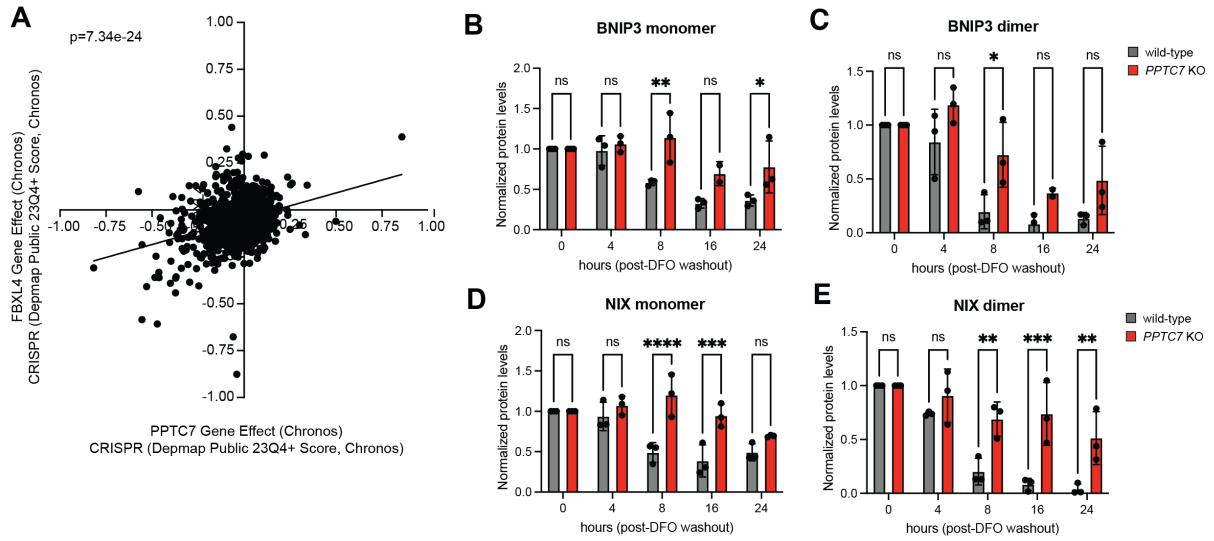

534 **Supplemental Figure 2: A.** DepMap essentiality profiles of PPTC7 gene effect (x-axis) and  
535 FBXL4 gene effect (y-axis). Linear regression analysis and associated p-value shown. **B.-E.**  
536 Statistical analysis of BNIP3 and NIX monomer and dimer turnover rate data in wild-type (gray  
537 bars) and *PPTC7* KO (red bars) 293T cells shown in Figure 2. \*\*\*\* $p < 0.0001$ , \*\*\* $p < 0.001$ ,  
538 \*\* $p < 0.01$ , \* $p < 0.05$ , ns = not significant, ordinary one-way ANOVA. Error bars represent standard  
539 deviation, data points represent individual biological replicates.

### Supplemental Figure 3

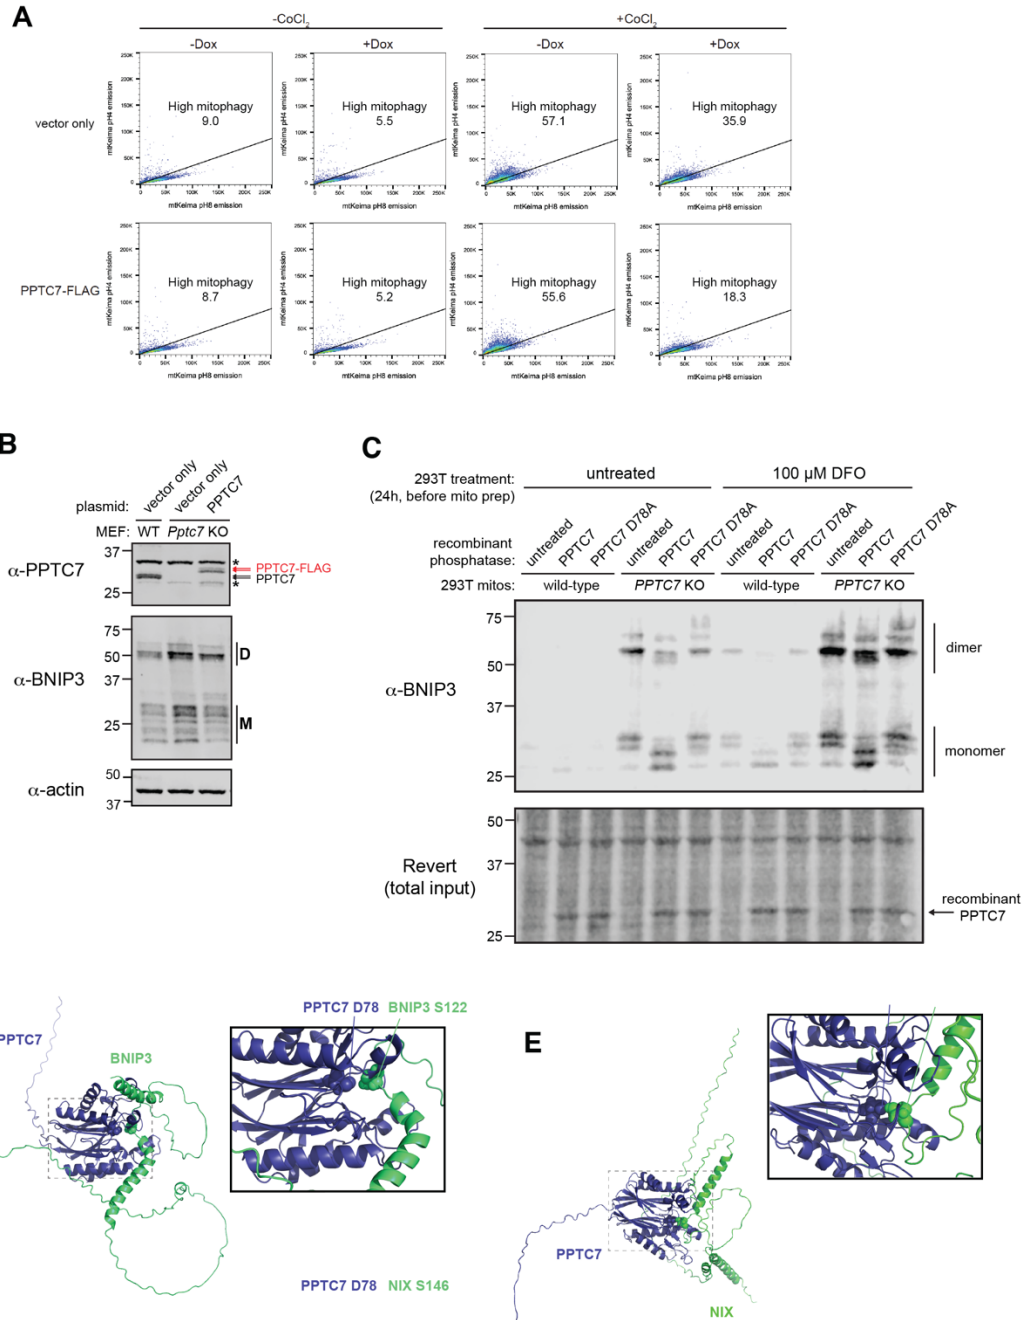

541 **Supplemental Figure 3: A.** FACS data shown for data represented in Figure 2D. Cells  
542 undergoing high mitophagy are above the diagonal line; percentages indicated in figure. **B.**  
543 Western blot of PPTC7 expressed in wild-type MEFs (black arrows), *Pptc7* KO MEFs, or *Pptc7*  
544 KO MEFs rescued with human PPTC7 (red arrows). \* represents a non-specific band. Basal  
545 BNIP3 levels across samples shown below; actin shown as a loading control. **C.** Western blot of  
546 BNIP3 in crude mitochondria isolated from wild-type or *PPTC7* KO 293T cells. Mitochondria were  
547 left untreated, treated with recombinant PPTC7, or treated with recombinant PPTC7 D78A. Revert  
548 stain is shown for loading; equal loading of recombinant proteins can be seen as depicted by  
549 arrows. **D.**, **E.** AlphaFold2 multimer predictions of the BNIP3-PPTC7 (**D.**) and the NIX-PPTC (**E.**)  
550 interaction. Residues of BNIP3 and NIX proximal to PPTC7 D78 highlighted in zoom-in image.  
551  
552

553

## 554 **Methods**

555

### 556 *Supplies and reagents*

557 Deferoxamine (DFO) and cobalt chloride were purchased from MilliporeSigma (Burlington, MA).  
558 MG132 and polyethylenimine (PEI) was purchased from Fisher Scientific (Hampton, NH).  
559 Lipofectamine 3000 was purchased from ThermoFisher (Waltham, MA). Fugene 6 was purchased  
560 from Promega (Madison, WI). Multiple plasmids were ordered or generated for this study,  
561 including: myc-*Mm*BNIP3-FL in pcDNA3.1, which was a kind gift from Joseph Gordon (Addgene  
562 #100796) and V5-miniTurbo-NES in pcDNA3.1, which was a kind gift from Alice Ting (Addgene  
563 #107170). pCMV-SPORT6-*Mm*NIX was purchased from Horizon Discoveries. pcDNA3.1-PPTC7-  
564 FLAG, pcDNA3.1-FLAG-*Mm*NIX, pcDNA3.1-PPTC7-GFP, pcDNA3.1-PPTC7-OMP25-FLAG,  
565 pcDNA3.1-PPTC7-V5-miniTurbo, and pcDNA3.1-ΔMTS-PPTC7-FLAG were generated for this  
566 study through standard PCR and restriction-enzyme based cloning techniques. Plasmids for the  
567 HeLa FLP-IN TREx system were generated using Gateway cloning. Briefly, constructs were PCR  
568 amplified with primers containing attB1 or attB2 sequences. These fragments were incubated with  
569 pDONR221 (a kind gift from Julia Pagan) and BP clonase for recombination. Positive constructs  
570 were incubated with LR clonase and the pcDNA5/FRT/TO-Venus-Flag-Gateway destination  
571 vector, which was a kind gift from Jonathon Pines (Addgene #40999). All cloned plasmids were  
572 validated via Sanger sequencing.

573

### 574 *Cell culture and Transfection*

575 293T were acquired from the American Type Culture Collection (Manassas, VA). *PPTC7* KO 293T  
576 cells were generated as previously described (Meyer *et al*, 2020) and MEF cells were generated  
577 from wild-type and *Pptc7*<sup>-/-</sup> mice embryos as previously described (Niemi *et al*, 2023). Wild-type,  
578 *Pptc7* KO, and *Pptc7/Bnip3/Nix* TKO MEFs were transduced with mt-Keima as previously  
579 described (Niemi *et al*, 2023). HeLa FLP-IN TREx cells stably expressing mt-Keima were a kind  
580 gift from Dr. Julia Pagan. Cells were cultured in growth media (Delbecco's Modified Eagle Media  
581 supplemented with 10% heat inactivated Fetal Bovine Serum and 1× penicillin/streptomycin).  
582 Cells were grown in a temperature-controlled incubator at 37°C and 5% CO<sub>2</sub>. Transient plasmid  
583 transfection into 293T wild-type and *PPTC7* KO cells was performed with polyethylenimine (PEI)  
584 for 24 to 48 hours. Transient plasmid transfection into U2OS and HeLa cells was performed with  
585 Lipofectamine 3000 for 5 hours. Stable plasmid transfection into HeLa FLP-IN cells were  
586 performed in the presence of pOG44 in a ratio of 0.5 μg pcDNA5 to 2 μg pOGG44. Transfections  
587 were performed with Fugene 6 (Promega) per manufacturer's directions for 24-48 hours before  
588 selection with 400 μg/mL hygromycin B.

589

### 590 *SDS-PAGE and immunoblotting*

591 Cells were lysed with radioimmunoprecipitation buffer (RIPA; 0.5% w/v sodium deoxycholate,  
592 150mM sodium chloride, 1.0% v/v IGEPAL CA-630, 1.0% sodium dodecyl sulfate (SDS), 50mM  
593 Tris pH8.0, 1mM EDTA pH8.0 in water) unless otherwise specified. After generating cell lysates,  
594 samples were clarified by centrifugation (21,100×g) at 4°C for 10 minutes, snap frozen in liquid  
595 nitrogen, and stored at -80°C before use. All samples were quantified with the bicinchoninic acid  
596 (BCA) assay kit (Thermo Scientific). Lysates were mixed with 5x sample buffer (312 mM Tris-  
597 Base, 25% w/v sucrose, 5% w/v SDS, 0.05% w/v bromophenol blue, 5% v/v β-mercaptoethanol,  
598 pH6.8) and boiled at 95°C for 10 minutes. Lysates (20-40 μg) were run on SDS-PAGE gels with  
599 Precision All-Blue Protein Standards (BioRad) before being transferred onto nitrocellulose  
600 membranes. Membranes were incubated with primary antibodies with 2% BSA or 3% nonfat diary  
601 milk in TBS-T for periods as indicated above. Primary antibodies used in immunoblotting include:  
602 anti-human BNIP3 (Cell Signaling Technology (CST) catalog #44060, dilution 1:1000, 48 hour  
603 incubation at 4°C), anti-rodent BNIP3 (CST catalog #3769, dilution 1:1000, 48 hour incubation at



604 4°C), anti-NIX (CST catalog #12396, dilution 1:1000, 48 hour incubation at 4°C), anti-PPTC7  
605 (Novus catalog #NBP190654, dilution 1:1000, 48 hour incubation at 4°C), anti-HIF1 $\alpha$  (CST  
606 catalog #36169, dilution 1:1000, overnight incubation at 4°C), anti- $\beta$ -actin (CST catalog #3700,  
607 dilution 1:1000; CST catalog #4970, dilution 1:1000; and Abcam catalog #ab170325, dilution  
608 1:1000; overnight incubation at 4°C), anti-FLAG (Sigma catalog #F1804, dilution 1:2000,  
609 overnight incubation at 4°C), anti-V5 (Fisher catalog #PIMA515253, dilution 1:1000, overnight  
610 incubation at 4°C), and anti-myc (Fisher catalog #MA121316, dilution 1:1000, overnight  
611 incubation at 4°C). Membranes were washed 2-3x with TBS-T for 5 minutes per wash and  
612 incubated with corresponding fluorophore-conjugated antibodies for 30 minutes at room  
613 temperature. Anti-680 or anti-800 conjugated mouse or rabbit antibodies (LiCOR) were used for  
614 detection. Membranes were then washed 2-3x with TBS-T for 5 minutes per wash and were  
615 imaged with a LiCOR OdysseyFC instrument using Image Studio software (LiCOR; version 5.2).

616

#### 617 *RNA extraction and qRT-PCR*

618 For RNA extraction, the collected cell pellets were processed using Monarch RNA extraction kit  
619 (New England BioLabs). The RNA samples were then quantified with nanodrop and normalized  
620 before cDNA synthesis (Lambda Biotechnologies). Quantitative PCR analyses with SYBR Green  
621 PCR Master Mix (Applied Biosystems) were done on a BioRad CFX-96 Touch Real-Time PCR  
622 Detection System controlled by CFX Maestro (ver2.2) on a computer. Primers used were: GAPDH  
623 forward 5'-TTCGCTCTCTGCTCCTCCTGTT-3', GAPDH reverse 5'-  
624 GCCCAATACGACCAAATCCGTTGA-3', BNIP3 forward 5'-GCCCACCTCGCTCGCAGACAC-3',  
625 BNIP3 reverse 5'-CAATCCGATGGCCAGCAAATGAGA-3', NIX forward 5'-  
626 CTACCCATGAACAGCAGCAA-3', and NIX reverse 5'-ATCTGCCCATCTTCTTGTGG-3'.

627

#### 628 *Flow cytometry*

629 For all experiments, wild-type MEFs or HeLa cells (i.e., with no mt-Keima expressed) were used  
630 as a negative control and were plated at the same density as other cells in the corresponding  
631 experiment. Cells were grown in standard DMEM media (25 mM glucose, 2 mM glutamine, 10%  
632 heat-inactivated FBS, 1x penicillin/streptomycin) for 48 hours. Cells were harvested by  
633 trypsinization and were resuspended in FluoroBrite media with 0.8% heat-inactivated FBS in 5mL  
634 polystyrene round-bottom tubes (Falcon) immediately prior to the flow cytometry experiments.  
635 The LSR-Fortessa (BD Biosciences) flow cytometer was used for the experiment, and the flow  
636 cytometer was controlled by BDFACSDiva (version 9.0). FSC (488 nm), SSC (excitation 488nm,  
637 emission 488 nm), QDot 605 (excitation 405nm, emission 610 nm), and PE-TexasRed (excitation  
638 585 nm, emission 610 nm). The laser intensities for Qdot 605 and PE-TexasRed were changed  
639 based on the emission profile of MEF wild-type cells for each experiment and were kept constant  
640 throughout the experiment. Cells were gated to select for live cells, single cells, and mt-Keima  
641 positive cells sequentially. Once gates were established in a given experiment, they were used  
642 for the duration of that experiment. Flow cytometry data were processed with FlowJo (version  
643 10.2.2), and the high mitophagy gate was drawn during analysis.

644

#### 645 *Immunofluorescence assay and confocal microscopy*

646 For immunofluorescence assay, cells grown on glass-bottom cover dishes (CellVis) were fixed in  
647 4% paraformaldehyde solution in PBS (15 minutes, room temperature). Fixed cells were  
648 permeabilized (0.1% Triton X-100 in PBS), blocked (10% FBS and 0.1% Triton X-100 in PBS),  
649 and then incubated overnight at 4°C with the indicated primary antibodies in blocking buffer.  
650 Primary antibodies used in immunofluorescence assays include anti-TOMM20 (Abcam catalog  
651 #56783, dilution 1:400) and anti-human BNIP3 (CST catalog #44060, dilution 1:100). After three  
652 washes (5 minutes each) in PBS, cells were incubated with secondary antibodies in blocking  
653 buffer for 30 min. The secondary antibodies used in immunofluorescence assays include donkey

654 anti-mouse Alexa Fluor 647 (Fisher catalog #A-31571, dilution 1:400) and donkey anti-rabbit  
655 Alexa Fluor 555 (Fisher catalog #A-31572, dilution 1:400). Cells were subsequently washed three  
656 times in PBS prior to imaging. Images were acquired on a Nikon Ti2 microscope equipped with  
657 Yokogawa CSU-W1 spinning disk confocal and SoRa modules, a Hamamatsu Orca-Fusion  
658 sCMOS camera and a Nikon 60x objective (for Figure 3A-B) or Nikon 100x 1.45 NA (for Figure  
659 4A-B) objective. All images were acquired using a 0.2- $\mu$ m step size with the spinning disk module,  
660 and image adjustments were made with ImageJ/Fiji.

661  
662 *DFO-induced iron chelation and washout*

663 For immunoblotting experiments to visualize changes of BNIP3 and NIX protein levels upon iron  
664 chelation, 293T wild-type and *PPTC7* KO cells were treated with 100  $\mu$ M DFO for 0-24 hours as  
665 indicated in the results section. After the indicated incubation time, the cells were harvested by  
666 cell scraping in phosphate-buffered saline (PBS) before cell lysis and immunoblotting analysis.

667  
668 For qRT-PCR experiments to quantify changes in *BNIP3* and *NIX* transcript level, 293T WT and  
669 *PPTC7* KO cells were treated with 100 $\mu$ M DFO for 24 hours, and the cells were harvested by cell  
670 scraping in PBS before RNA extracton and qRT-PCR analysis.

671  
672 For DFO washout experiments, after treating 293T WT and *PPTC7* KO cells with 100 $\mu$ M DFO for  
673 24 hours, cells were washed with PBS and was switched to fresh DMEM media (for Figure 2B-F)  
674 or with DMEM containing 0.1% EtOH (as vehicle control) or 10  $\mu$ M MG132 (for Figure 2I) for 0-  
675 24 hours as indicated in the results section. After the indicated incubation time, the cells were  
676 harvested by cell scraping in phosphate-buffered saline (PBS) before cell lysis and  
677 immunoblotting analysis.

678  
679 For flow cytometry experiments to determine the change of mitophagic flux with DFO dosage,  
680 MEF mt-Keima wild-type and *Pptc7* KO cells were treated with 0-100  $\mu$ M DFO as indicated in the  
681 results section for 24 hours before downstream processing for flow cytometry. To understand  
682 whether the DFO-induced mitophagy is BNIP3- and NIX-mediated, MEF mt-Keima wild-type,  
683 *Pptc7* KO, and *Pptc7/Bnip3/Nix* TKO cells were treated with 100 $\mu$ M DFO for 24 hours before  
684 downstream processing for flow cytometry.

685  
686 *MG132 proteasomal inhibition time course*

687 For MG132 proteasomal inhibition time course experiment done in Figure 2G-H, 293T WT and  
688 *PPTC7* KO cells were treated with 0.1% EtOH (as vehicle control) or 10  $\mu$ M MG132 for 0-6 hours  
689 as indicated in the results section. After the indicated incubation time, the cells were harvested  
690 by cell scraping in PBS before cell lysis and immunoblotting analysis.

691  
692 *Analysis of PPTC7 localization relative to BNIP3*

693 U2OS cells were transiently transfected with PPTC7-GFP plasmid. Cells were then passaged into  
694 glass-bottom dishes. Cells were allowed to adhere for 12 hours and subsequently treated with  
695 freshly prepared DFP (1 mM; Sigma-Aldrich) for 24 hours prior to fixation. Where indicated, cells  
696 were then washed with fresh media, and fixed after an additional 4 hours of incubation.  
697 Immunofluorescence staining and confocal microscopy were then performed on cells. To  
698 determine the co-enrichment of PPTC7 with BNIP3, enlarged foci enriched for BNIP3 signal  
699 relative to TOMM20 were manually counted in Fiji by examining single plane images throughout  
700 z-series of individual cells blinded to the corresponding PPTC7 image, followed by assessment  
701 of whether PPTC7 was co-enriched.

702  
703 *Analysis of the effect of PPTC7 overexpression on BNIP3 immunofluorescence*

704 For analysis of BNIP3 staining by immunofluorescence, HeLa cells were transiently transfected  
705 with cytosolic GFP or PPTC7-GFP plasmids. Cells were allowed to adhere to glass-bottom dishes  
706 for 12 hours and treated with freshly prepared CoCl<sub>2</sub> (500 μM; Sigma-Aldrich) 12 hours prior to  
707 fixation. Cells were imaged with identical imaging conditions between experimental replicates.  
708 Cells that had GFP signal above an arbitrary threshold that was consistently maintained between  
709 experiments were blindly identified and manually categorized as having mitochondrial or diffuse  
710 non-mitochondrial BNIP3 signal in Fiji by examining maximum z-projections.

711  
712 *Analysis of the effect of PPTC7 mutant expression on BNIP3 and NIX total protein levels*

713 HeLa FLP-IN T-REx cells expressing wild-type PPTC7 or various mutants (e.g., D78A) were  
714 generated as described above. To induce expression of these constructs, cells were treated with  
715 10 μM doxycycline for 24-32 hours, after which BNIP3 and NIX expression was induced by  
716 treating cells with 200 μM CoCl<sub>2</sub> for 16 hours. Cells were collected, lysed in RIPA buffer, run via  
717 SDS-PAGE and western blotted for each protein as described above (see “SDS-PAGE and  
718 immunoblotting”).

719  
720 *Proximity labeling*

721 Wild-type 293T cells were transiently transfected with pcDNA3.1-MCS (empty vector), pcDNA3.1-  
722 V5-miniTurbo-NES, or pcDNA3.1-PPTC7-V5-miniTurbo before cells were treated with either  
723 water or 100 μM DFO (supplemented in growth media) for another 24 hours. For labeling, DMSO  
724 or 250 μM biotin were added to cells, and cells were incubated at 37°C for 30 minutes. Labeling  
725 reactions were quenched by washing the cells three times with ice-cold PBS and incubating the  
726 cells at 4°C. Cells were then harvested in ice cold PBS before lysed with RIPA, clarified, and  
727 quantified via BCA. The lysates were then incubated with 80 μL streptavidin magnetic beads (New  
728 England Biolabs) at 4°C overnight. The beads were then washed twice with RIPA buffer, once  
729 with Wash Buffer 2 (500 mM sodium chloride, 0.1% w/v deoxycholate, 1% Triton X-100, 1 mM  
730 EDTA, 50 mM HEPES, pH 7.5), once with Wash Buffer 3 (250 mM sodium chloride, 0.5% Triton  
731 X-100, 0.5% w/v deoxycholate, 1 mM EDTA, 50 mM HEPES, pH 8.1), once with Wash Buffer 4  
732 (150 mM sodium chloride, 50 mM HEPES, pH 7.4), and once with Wash buffer 5 (50 mM  
733 ammonium bicarbonate in MS-grade water). The bound species were eluted by adding 20 μL 5x  
734 sample buffer, boiling at 95°C for 10 minutes, vortexing for 10 minutes, and boiling at 95°C for 10  
735 minutes. The samples were then run on SDS-PAGE gels, and immunoblotting was performed to  
736 probe for BNIP3 and NIX.

737  
738 *Data/statistical analysis and figure generation*

739  
740 Statistical analysis was performed using Microsoft Excel and/or Prism software (GraphPad,  
741 version 10). Supplemental Figure 1A was generated using Seaborn library on Python. A selected  
742 list of HIF target genes were curated (Dengler *et al*, 2014) as mined from datasets in mouse *Pptc7*  
743 KO heart and liver proteomics (Niemi *et al*, 2019). Figure 2C was generated using AlphaFold2.  
744 Supplemental Figures 2C-D were generated using AlphaFold multimer mode; images were  
745 generated using PyMOL (Version 2.5.2). Figure 3A was generated using BioRender with an  
746 appropriate license. All figures were generated using Adobe Illustrator.

747 **References**

748

749 Abeliovich H, Zarei M, Rigbolt KTG, Youle RJ & Dengjel J (2013) Involvement of mitochondrial  
750 dynamics in the segregation of mitochondrial matrix proteins during stationary phase mitophagy.  
751 *Nature Communications* 4: 2789

752

753 Allen GFG, Toth R, James J & Ganley IG (2013) Loss of iron triggers PINK1/Parkin-independent  
754 mitophagy. *EMBO reports* 14: 1127–1135

755

756 Alsina D, Lytovchenko O, Schab A, Atanassov I, Schober FA, Jiang M, Koolmeister C, Wedell A,  
757 Taylor RW, Wredenberg A, *et al* (2020) FBXL4 deficiency increases mitochondrial removal by  
758 autophagy. *EMBO Mol Med*

759

760 Antoun G, McBride S, Vanstone JR, Naas T, Michaud J, Redpath S, McMillan HJ, Brophy J,  
761 Daoud H, Chakraborty P, *et al* (2016) Detailed Biochemical and Bioenergetic Characterization of  
762 FBXL4-Related Encephalomyopathic Mitochondrial DNA Depletion. In *JIMD Reports, Volume 27*,  
763 Morava E Baumgartner M Patterson M Rahman S Zschocke  
764 J & Peters V (eds) pp 1–9. Berlin, Heidelberg: Springer

765

766 Ballout RA, Al Alam C, Bonnen PE, Huemer M, El-Hattab AW & Shbarou R (2019) FBXL4-Related  
767 Mitochondrial DNA Depletion Syndrome 13 (MTDPS13): A Case Report With a Comprehensive  
768 Mutation Review. *Front Genet* 10

769

770 Bonnen PE, Yarham JW, Besse A, Wu P, Faqeih EA, Al-Asmari AM, Saleh MAM, Eyaid W,  
771 Hadeel A, He L, *et al* (2013) Mutations in FBXL4 Cause Mitochondrial Encephalopathy and a  
772 Disorder of Mitochondrial DNA Maintenance. *The American Journal of Human Genetics* 93: 471–  
773 481

774

775 Calvo SE, Julien O, Clauser KR, Shen H, Kamer KJ, Wells JA & Mootha VK (2017) Comparative  
776 Analysis of Mitochondrial N-Termini from Mouse, Human, and Yeast. *Molecular & Cellular*  
777 *Proteomics* 16: 512–523

778

779 Cao Y, Zheng J, Wan H, Sun Y, Fu S, Liu S, He B, Cai G, Cao Y, Huang H, *et al* (2023) A  
780 mitochondrial SCF-FBXL4 ubiquitin E3 ligase complex degrades BNIP3 and NIX to restrain  
781 mitophagy and prevent mitochondrial disease. *The EMBO Journal* n/a: e113033

782

783 Dai H, Zhang VW, El-Hattab AW, Ficicioglu C, Shinawi M, Lines M, Schulze A, McNutt M, Gotway  
784 G, Tian X, *et al* (2017) FBXL4 defects are common in patients with congenital lactic acidemia and  
785 encephalomyopathic mitochondrial DNA depletion syndrome. *Clinical Genetics* 91: 634–639

786

787 Delgado JM, Shepard LW, Lamson SW, Liu SL & Shoemaker CJ (2023) The ER membrane  
788 protein complex restricts mitophagy by controlling BNIP3 turnover. *The EMBO Journal*: 1–29

789

790 Dempster JM, Rossen J, Kazachkova M, Pan J, Kugener G, Root DE & Tsherniak A (2019)  
791 Extracting Biological Insights from the Project Achilles Genome-Scale CRISPR Screens in Cancer  
792 Cell Lines *Cancer Biology*

793

794 Elcocks H, Brazel AJ, McCarron KR, Kaulich M, Husnjak K, Mortiboys H, Clague MJ & Urbé S  
795 (2023) FBXL4 ubiquitin ligase deficiency promotes mitophagy by elevating NIX levels. *The EMBO*  
796 *Journal* n/a: e112799

797

- 798 Esteban-Martínez L & Boya P (2018) BNIP3L/NIX-dependent mitophagy regulates cell  
799 differentiation via metabolic reprogramming. *Autophagy* 14: 915–917  
800
- 801 Gai X, Ghezzi D, Johnson MA, Biagosch CA, Shamseldin HE, Haack TB, Reyes A, Tsukikawa M,  
802 Sheldon CA, Srinivasan S, *et al* (2013) Mutations in FBXL4, Encoding a Mitochondrial Protein,  
803 Cause Early-Onset Mitochondrial Encephalomyopathy. *The American Journal of Human*  
804 *Genetics* 93: 482–495  
805
- 806 Gok MO, Connor OM, Wang X, Menezes CJ, Llamas CB, Mishra P & Friedman JR (2023) The  
807 outer mitochondrial membrane protein TMEM11 demarcates spatially restricted BNIP3/BNIP3L-  
808 mediated mitophagy. *Journal of Cell Biology* 222: e202204021  
809
- 810 Gonzalez-Mariscal I, Martin-Montalvo A, Ojeda-Gonzalez C, Rodriguez-Eguren A, Gutierrez-Rios  
811 P, Navas P & Santos-Ocana C (2017) Balanced CoQ6 biosynthesis is required for lifespan and  
812 mitophagy in yeast. *Microb Cell* 4: 38–51  
813
- 814 González-Mariscal I, Martin-Montalvo A, Vazquez-Fonseca L, Pomares-Viciano T, Sánchez-  
815 Cuesta A, Fernández-Ayala DJ, Navas P & Santos-Ocana C (2018) The mitochondrial  
816 phosphatase PPTC7 orchestrates mitochondrial metabolism regulating coenzyme Q10  
817 biosynthesis. *Biochimica et Biophysica Acta (BBA) - Bioenergetics* 1859: 1235–1248  
818
- 819 Guo X, Niemi NM, Coon JJ & Pagliarini DJ (2017a) Integrative proteomics and biochemical  
820 analyses define Ptc6p as the *Saccharomyces cerevisiae* pyruvate dehydrogenase phosphatase.  
821 *Journal of Biological Chemistry* 292: 11751–11759  
822
- 823 Guo X, Niemi NM, Hutchins PD, Condon SGF, Jochem A, Ulbrich A, Higbee AJ, Russell JD,  
824 Senes A, Coon JJ, *et al* (2017b) Ptc7p Dephosphorylates Select Mitochondrial Proteins to  
825 Enhance Metabolic Function. *Cell Reports* 18: 307–313  
826
- 827 Hanna RA, Quinsay MN, Orogo AM, Giang K, Rikka S & Gustafsson ÅB (2012) Microtubule-  
828 associated Protein 1 Light Chain 3 (LC3) Interacts with Bnip3 Protein to Selectively Remove  
829 Endoplasmic Reticulum and Mitochondria via Autophagy \*. *Journal of Biological Chemistry* 287:  
830 19094–19104  
831
- 832 Horie C, Suzuki H, Sakaguchi M & Mihara K (2002) Characterization of signal that directs C-tail-  
833 anchored proteins to mammalian mitochondrial outer membrane. *Mol Biol Cell* 13: 1615–1625  
834
- 835 Hung V, Lam SS, Udeshi ND, Svinkina T, Guzman G, Mootha VK, Carr SA & Ting AY (2017)  
836 Proteomic mapping of cytosol-facing outer mitochondrial and ER membranes in living human cells  
837 by proximity biotinylation. *eLife*  
838
- 839 Juneau K, Nislow C & Davis RW (2009) Alternative Splicing of PTC7 in *Saccharomyces cerevisiae*  
840 Determines Protein Localization. *Genetics* 183: 185–194  
841
- 842 Kitada T, Asakawa S, Hattori N, Matsumine H, Yamamura Y, Minoshima S, Yokochi M, Mizuno  
843 Y & Shimizu N (1998) Mutations in the parkin gene cause autosomal recessive juvenile  
844 parkinsonism. *Nature* 392: 605–608  
845
- 846 Kolitsida P, Nolic V, Zhou J, Stumpe M, Niemi NM, Dengjel J & Abeliovich H (2023) The pyruvate  
847 dehydrogenase complex regulates mitophagic trafficking and protein phosphorylation. *Life*  
848 *Science Alliance* 6

849  
850 Kolitsida P, Zhou J, Rackiewicz M, Nolic V, Dengjel J & Abeliovich H (2019) Phosphorylation of  
851 mitochondrial matrix proteins regulates their selective mitophagic degradation. *PNAS* 116:  
852 20517–20527  
853  
854 Lee S & Kim J-S (2014) Mitophagy: Therapeutic Potentials for Liver Disease and Beyond. *Toxicol*  
855 *Res* 30: 243–250  
856  
857 Martín-Montalvo A, González-Mariscal I, Pomares-Viciano T, Padilla-López S, Ballesteros M,  
858 Vazquez-Fonseca L, Gandolfo P, Brautigan DL, Navas P & Santos-Ocaña C (2013) The  
859 Phosphatase Ptc7 Induces Coenzyme Q Biosynthesis by Activating the Hydroxylase Coq7 in  
860 Yeast \*. *Journal of Biological Chemistry* 288: 28126–28137  
861  
862 Maruyama H, Morino H, Ito H, Izumi Y, Kato H, Watanabe Y, Kinoshita Y, Kamada M, Nodera H,  
863 Suzuki H, *et al* (2010) Mutations of optineurin in amyotrophic lateral sclerosis. *Nature* 465: 223–  
864 226  
865  
866 Meyer JG, Niemi NM, Pagliarini DJ & Coon JJ (2020) Quantitative shotgun proteome analysis by  
867 direct infusion. *Nat Methods* 17: 1222–1228  
868  
869 Meyers RM, Bryan JG, McFarland JM, Weir BA, Sizemore AE, Xu H, Dharia NV, Montgomery  
870 PG, Cowley GS, Pantel S, *et al* (2018) Computational correction of copy-number effect improves  
871 specificity of CRISPR-Cas9 essentiality screens in cancer cells.  
872  
873 Mishra E & Thakur MK (2023) Mitophagy: A promising therapeutic target for neuroprotection  
874 during ageing and age-related diseases. *British Journal of Pharmacology* 180: 1542–1561  
875  
876 Morgenstern M, Stiller SB, Lübbert P, Peikert CD, Dannenmaier S, Drepper F, Weill U, Höß P,  
877 Feuerstein R, Gebert M, *et al* (2017) Definition of a High-Confidence Mitochondrial Proteome at  
878 Quantitative Scale. *Cell Reports* 19: 2836–2852  
879  
880 Ney PA (2015) Mitochondrial autophagy: Origins, significance, and role of BNIP3 and NIX.  
881 *Biochimica et Biophysica Acta (BBA) - Molecular Cell Research* 1853: 2775–2783  
882  
883 Nguyen-Dien GT, Kozul K-L, Cui Y, Townsend B, Kulkarni PG, Ooi SS, Marzio A, Carrodus N,  
884 Zuryn S, Pagano M, *et al* (2023) FBXL4 suppresses mitophagy by restricting the accumulation of  
885 NIX and BNIP3 mitophagy receptors. *The EMBO Journal* n/a: e112767  
886  
887 Niemi NM & Pagliarini DJ (2021) The extensive and functionally uncharacterized mitochondrial  
888 phosphoproteome. *Journal of Biological Chemistry* 297  
889  
890 Niemi NM, Serrano LR, Muehlbauer LK, Balnis CE, Wei L, Smith AJ, Kozul K-L, Forny M, Connor  
891 OM, Rashan EH, *et al* (2023) PPTC7 maintains mitochondrial protein content by suppressing  
892 receptor-mediated mitophagy. *Nat Commun* 14: 6431  
893  
894 Niemi NM, Wilson GM, Overmyer KA, Vögtle F-N, Myketin L, Lohman DC, Schueler KL, Attie AD,  
895 Meisinger C, Coon JJ, *et al* (2019) Pptc7 is an essential phosphatase for promoting mammalian  
896 mitochondrial metabolism and biogenesis. *Nat Commun* 10: 3197  
897  
898 Ordureau A, Kraus F, Zhang J, An H, Park S, Ahfeldt T, Paulo JA & Harper JW (2021) Temporal  
899 proteomics during neurogenesis reveals large-scale proteome and organelle remodeling via

- 900 selective autophagy. *Molecular Cell* 81: 5082-5098.e11  
901
- 902 Pickles S, Vigié P & Youle RJ (2018) Mitophagy and Quality Control Mechanisms in Mitochondrial  
903 Maintenance. *Current Biology* 28: R170–R185  
904
- 905 Rensvold JW, Ong S-E, Jeevananthan A, Carr SA, Mootha VK & Pagliarini DJ (2013)  
906 Complementary RNA and Protein Profiling Identifies Iron as a Key Regulator of Mitochondrial  
907 Biogenesis. *Cell Reports* 3: 237–245  
908
- 909 Rensvold JW, Shishkova E, Sverchkov Y, Miller IJ, Cetinkaya A, Pyle A, Manicki M, Brademan  
910 DR, Alanay Y, Raiman J, *et al* (2022) Defining mitochondrial protein functions through deep  
911 multiomic profiling. *Nature*: 1–7  
912
- 913 Resnik ER, Herron JM, Lyu S-C & Cornfield DN (2007) Developmental regulation of hypoxia-  
914 inducible factor 1 and prolyl-hydroxylases in pulmonary vascular smooth muscle cells.  
915 *Proceedings of the National Academy of Sciences* 104: 18789–18794  
916
- 917 Rhee H-W, Zou P, Udeshi ND, Martell JD, Mootha VK, Carr SA & Ting AY (2013) Proteomic  
918 Mapping of Mitochondria in Living Cells via Spatially Restricted Enzymatic Tagging. *Science* 339:  
919 1328–1331  
920
- 921 Schäfer JA, Bozkurt S, Michaelis JB, Klann K & Münch C (2022) Global mitochondrial protein  
922 import proteomics reveal distinct regulation by translation and translocation machinery. *Molecular*  
923 *Cell* 82: 435-446.e7  
924
- 925 Schweers RL, Zhang J, Randall MS, Loyd MR, Li W, Dorsey FC, Kundu M, Opferman JT,  
926 Cleveland JL, Miller JL, *et al* (2007) NIX is required for programmed mitochondrial clearance  
927 during reticulocyte maturation. *PNAS* 104: 19500–19505  
928
- 929 Sin J, Andres AM, Taylor DJR, Weston T, Hiraumi Y, Stotland A, Kim BJ, Huang C, Doran KS &  
930 Gottlieb RA (2016) Mitophagy is required for mitochondrial biogenesis and myogenic  
931 differentiation of C2C12 myoblasts. *Autophagy* 12: 369–380  
932
- 933 Sun N, Malide D, Liu J, Rovira II, Combs CA & Finkel T (2017) A fluorescence-based imaging  
934 method to measure in vitro and in vivo mitophagy using mt-Keima. *Nat Protoc* 12: 1576–1587  
935
- 936 Sun Y, Cao Y, Wan H, Memetimin A, Cao Y, Li L, Wu C, Wang M, Chen S, Li Q, *et al* (2023) A  
937 mitophagy sensor PPTC7 controls BNIP3 and NIX degradation to regulate mitochondrial mass.  
938 *Molecular Cell* 0  
939
- 940 Tal R, Winter G, Ecker N, Klionsky DJ & Abeliovich H (2007) Aup1p, a Yeast Mitochondrial Protein  
941 Phosphatase Homolog, Is Required for Efficient Stationary Phase Mitophagy and Cell Survival. *J*  
942 *Biol Chem* 282: 5617–5624  
943
- 944 Uoselis L, Nguyen TN & Lazarou M (2023) Mitochondrial degradation: Mitophagy and beyond.  
945 *Molecular Cell* 0  
946
- 947 Valente EM, Abou-Sleiman PM, Caputo V, Muqit MMK, Harvey K, Gispert S, Ali Z, Turco DD,  
948 Bentivoglio AR, Healy DG, *et al* (2004) Hereditary Early-Onset Parkinson's Disease Caused by  
949 Mutations in PINK1. *Science* 304: 1158–1160  
950

- 951 Vögtle F-N, Burkhart JM, Gonczarowska-Jorge H, Kücükköse C, Taskin AA, Kopczynski D,  
952 Ahrends R, Mossmann D, Sickmann A, Zahedi RP, *et al* (2017) Landscape of submitochondrial  
953 protein distribution. *Nat Commun* 8: 290  
954
- 955 Wang GL & Semenza GL (1993a) General involvement of hypoxia-inducible factor 1 in  
956 transcriptional response to hypoxia. *PNAS* 90: 4304–4308  
957
- 958 Wang GL & Semenza GL (1993b) Desferrioxamine induces erythropoietin gene expression and  
959 hypoxia-inducible factor 1 DNA-binding activity: implications for models of hypoxia signal  
960 transduction. *Blood* 82: 3610–3615  
961
- 962 Wang S, Long H, Hou L, Feng B, Ma Z, Wu Y, Zeng Y, Cai J, Zhang D & Zhao G (2023) The  
963 mitophagy pathway and its implications in human diseases. *Sig Transduct Target Ther* 8: 1–28  
964
- 965 Williams CC, Jan CH & Weissman JS (2014) Targeting and plasticity of mitochondrial proteins  
966 revealed by proximity-specific ribosome profiling. *Science* 346: 748–751  
967
- 968 Zhang L, Li L, Liu H, Borowitz JL & Isom GE (2009) BNIP3 mediates cell death by different  
969 pathways following localization to endoplasmic reticulum and mitochondrion. *FASEB j* 23: 3405–  
970 3414  
971
- 972 Zhao J-F, Rodger CE, Allen GFG, Weidlich S & Ganley IG (2020) HIF1 $\alpha$ -dependent mitophagy  
973 facilitates cardiomyoblast differentiation. *CST* 4: 99–113  
974
- 975 Zimprich A, Benet-Pagès A, Struhal W, Graf E, Eck SH, Offman MN, Haubenberger D,  
976 Spielberger S, Schulte EC, Lichtner P, *et al* (2011) A Mutation in VPS35, Encoding a Subunit of  
977 the Retromer Complex, Causes Late-Onset Parkinson Disease. *The American Journal of Human*  
978 *Genetics* 89: 168–175  
979
